# Supplementary material
Source: MDPI journal article supplement (https://www.mdpi.com/2071-1050/16/5/1910)
Supplement: s1 [file s1]

## Supplemental information for Das et al. (2024)

### Section I

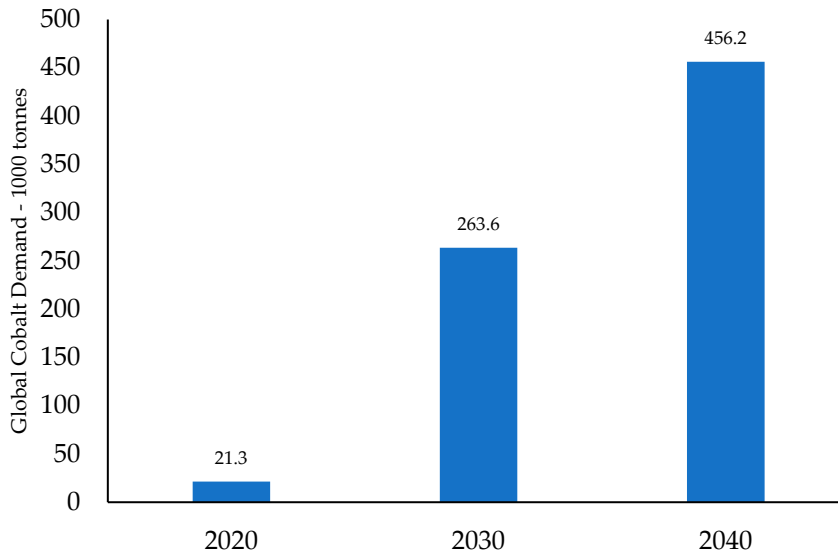

**Figure S1:** Projected cobalt demand, 2020-2040 [72].

### Section II

#### Description of Cobalt Supply Chain Used in Study

##### 1. Cobalt Mining

The first step in the supply chain is the mining of copper–cobalt ore. Mining data are based on the Tenke Fungurume Mine (TFM) in the DRC, which accounted for 29% of production capacity in 2017 [7]. This data set is the most complete available and contains primary data directly from the mine [46]. The ore grades used in this study, 0.3% cobalt and 2.95% copper, were reported by China Molybdenum (2018) [63] on the TFM, which is representative of other mines in the region [12]. Open-pit mining is used to extract ore from the copper–cobalt-bearing deposits in the DRC. Energy consumed during the mining phase at the TFM is sourced from the combustion of diesel fuel used in the equipment for loading and hauling the blasted material to the crusher [46]. Overburden material is removed through drilling and the use of blasting agents and then hauled to the waste ore stockpile [64]. A strip ratio of 2.8 (e.g., the ratio of waste generated per unit of ore [64]) was used to quantify the amount of waste rock produced.

Water is consumed for dust control, drinking water, sanitation, and ore washing, and is pumped from a nearby groundwater well [64]. Particulate matter (PM) emissions were estimated from vehicle exhaust, run-of-mill crushing, mine drilling, blasting, road entrainment, and wind erosion [46].

##### 2. Processing

After the copper–cobalt ore has been mined, transported, and crushed, it is then processed to make cobalt hydroxide ( $\text{Co}(\text{OH})_2$ ) at a plant on-site at the TFM [64]. A process yield of 80% for converting the cobalt contained in ore into  $\text{Co}(\text{OH})_2$  and 95% for converting the copper content into copper cathodes was taken from Dai et al. (2018) [46]. All electricity consumed at the TFM for ore processing is generated from nearby hydropower facilities [64]. The raw ore contains cobalt in the insoluble trivalent form,  $\text{Co}^{3+}$ , so sulfur dioxide, sulfuric acid, and water are added to leach the soluble divalent form,  $\text{Co}^{2+}$ . The sulfuric acid and sulfur dioxide used in this process are produced at an on-

site plant using sulfur and recovered sulfur dioxide from ore processing [46]. Sodium hydroxide is then added to neutralize the leached copper–cobalt solution [64]. Copper and cobalt are separated through solvent extraction. The cobalt-rich solution then undergoes a purification step where limestone and lime are added to remove iron, aluminum, and manganese impurities and to recover any remaining copper. Finally,  $\text{Co}(\text{OH})_2$  is precipitated out of the solution through the addition of magnesia ( $\text{MgO}$ ). Because the copper has been removed at this point, the impacts from the  $\text{MgO}$  are allocated to the  $\text{Co}(\text{OH})_2$  [46]. The other inputs and emissions are allocated based on a ratio between the total mass of the  $\text{Co}(\text{OH})_2$  and the copper cathode produced during this phase. The tailings, which contain toxic metals that can migrate into the environment from storage facilities, are disposed of at an on-site tailings pond [64,13]. Data for the quantity and impacts of tailings management at TFM were not available; thus, Ecoinvent (v. 3.8) background data were used.

### 3. Refining

Data for the refining of  $\text{Co}(\text{OH})_2$  into  $\text{CoSO}_4$  was gathered from the Tongxiang plant of Huayou Cobalt [46]. In 2017, Huayou Cobalt accounted for 34% of China's refined cobalt production and 20% of worldwide production. The refining process begins with  $\text{Co}(\text{OH})_2$  being leached with sulfuric acid and  $\text{Na}_2\text{S}_2\text{O}_5$ . It then undergoes solvent extraction where kerosene and other reagents are added to the mix, separating the cobalt from any nickel, after which the solution is evaporated and crystallized, filtered, and dried to produce  $\text{CoSO}_4$  suitable for batteries. To allocate impacts of the  $\text{CoSO}_4$  appropriately to the cobalt, the inputs and outputs were multiplied by the percentage of cobalt by molecular mass in  $\text{CoSO}_4$ . Data regarding the sources of electricity for the State Grid Corporation of China are based on Ecoinvent (v 3.8) background data. Refinery locations outside of China were chosen to understand how location may impact the LCA results. Finland's Kokkola facility was chosen because it is the largest cobalt refinery outside of China (though it provides only 10% of total refined production [7]). Canada's Electra Battery Materials was chosen given that this facility (now under construction) would be the first cobalt refinery in Canada (i.e., Cobalt, Ontario, Canada). Although site-specific data for these plants could not be located, the impacts were modeled using the same method as Kelly et al. (2020) [47] by adjusting the grid mix and LCI inputs of the data from the Chinese refinery to be representative of location-specific sources when available.

### 4. Transportation

Due to security concerns and the unreliability of rail transport in the DRC region,  $\text{Co}(\text{OH})_2$  is transported from the TFM by truck [64] to Dar es Salaam, Tanzania (2030 km), for shipping; it is the closest port to the TFM used for the export of cobalt products [46,4]. From there, cobalt is shipped to the Port of Shanghai (12,971 km), where it is trucked an additional 200 km to the Tongxiang cobalt refinery [46]. For the Finland refinery scenario,  $\text{Co}(\text{OH})_2$  is shipped from Dar es Salaam to the Port of Kokkola (16,325 km), which is located next to the refinery. In the Canada refining scenario,  $\text{Co}(\text{OH})_2$  is shipped from Dar es Salaam to the Port of Toronto (22,970 km), where it is transported by freight rail an additional 505 km to the Electra Battery Materials refinery.

Transportation distances from the specific cobalt refinery to a cathode manufacturing facility depend on the cathode chemistry. For NMC (111 and 811) cathodes, China, Korea, and Japan are the top manufacturers, with 55%, 18%, and 27% market shares, respectively, while for NCA, the respective market shares are 7%, 5%, and 88% [53-54]. Battery-grade  $\text{CoSO}_4$  is assumed to travel by truck from the Tongxiang refinery to the Port of Shanghai for export to South Korea and Japan. Then, the  $\text{CoSO}_4$  is shipped to the port closest to the largest cathode manufacturer in the country. If the exact distance to the cathode production facility was not available, a transport distance of 200 km was assumed. A weighted average was calculated by multiplying the market share of each country by the total transport distances to move  $\text{CoSO}_4$  to the largest cathode manufacturer. Once the battery-grade  $\text{CoSO}_4$  has been refined and transported to a cathode manufacturing facility, there is no additional material requirement or environmental burden from the cobalt supply chain, so no further impacts are allocated to cobalt from the battery manufacturing processes.

### 5. Use

LIBs are used as BESSs in both utility-scale grids and microgrids. Excess generation from either wind and solar power sources, or from grid power, can be used to charge batteries. They are dispatched when demand is high and the facilities are not generating enough power to meet it. The energy densities used in this study for NMC111, NCA,

and NMC811 [48] are 143 Wh/kg, 159 Wh /kg, and 149 Wh/kg, respectively. The highest energy density of NCA LIBs allows them to store more energy per unit of mass, reducing the material intensity on a per MWh basis compared to NMC111 and NMC811.

A 500 MW LIB is assumed for this study. LIBs are designed to discharge a specific number of times before replacement. Both the LIB chemistries are assumed to have a cycle life of 7300 cycles (approximately 1 cycle per day for 20 years). There are many factors that influence the efficiency and storage capacity of batteries, such as operating temperature, age, and internal (electrical) resistance. In the use phase, the battery capacities are augmented at specific intervals of time to ensure that usable storage capacity is close to 100% at all times. This research specifically includes the impact of battery augmentation on the total life-cycle GWP of batteries from the cobalt supply chain. Augmentation accounts for battery degradation (approximately 2% per year) and ensures that a battery's installed capacity and usable capacity are at or above the contractually required capacity (500 MW) imposed on the company (Table 5 shows the schedule).

#### 6. *End-of-life*

Given the lack of data available to quantify the impacts of recycling for different battery chemistries and the nascent stage of recycling in general [42,1], recycling is not included in this research. Additional LCAs of recycling, specifically for ESSs, will be necessary to compare the impacts of recycling with the virgin cobalt supply chain; however, currently there is a lack of data regarding the impacts of these recycling processes.

### Section III

**Table S1: Top five global producers of Cobalt [6]**

| Country                            | Production in 2022<br>(Metric tons) |
|------------------------------------|-------------------------------------|
| Democratic Republic of Congo (DRC) | 130000                              |
| Russia                             | 8900                                |
| Australia                          | 5900                                |
| Canada                             | 3900                                |
| Philippines                        | 3800                                |

**Table S.2** summarizes some recent, significant LCA studies on LIBs. Often, the results for LCAs of LIBs are inconsistent or difficult to intercompare due to obscure life cycle inventories (LCIs), varying methodologies, variable system boundaries, and different products reviewed [48]. Because EVs and BESSs use the same LIB chemistries and cells, the LCIs from EV LCAs can be interchanged with those of grid-scale BESSs [1].

**Table S2: LCA studies of LIBs published in the literature**

| Article                        | LIB variant under study | Application             | Life cycle phases included in system boundary | Scope of the analysis                        |
|--------------------------------|-------------------------|-------------------------|-----------------------------------------------|----------------------------------------------|
| Tao et al. 2023 [24]           | Ternary Li-Ion Battery  | Mobility                | Cradle to gate, recycling                     | Life cycle environmental assessment          |
| Guven and Kayalica (2023) [25] | NMC, NCA, LFP           | Passenger ferry         | Cradle to gate                                | Life cycle environmental and cost assessment |
| Jiang et al. 2022 [26]         | NMC111, LFP             | Traction                | Recycling                                     | Life cycle environmental assessment          |
| Yudhistira et al. 2022 [27]    | NMC, NCA, LFP           | Grid storage            | Cradle to grave                               | Life cycle environmental assessment          |
| Chordia et al., 2021 [28]      | NMC811                  | Automotive applications | Cradle to grave                               | Life cycle environmental assessment          |
| Varlet et al. 2020 [29]        | LFP, LMO, NCA, NMC      | Residential storage     | Cradle to gate                                | Life cycle environmental analysis            |
| Sun et al., 2020 [30]          | NMC622, NMC811          | Automotive applications | Cradle to grave                               | Life cycle environmental assessment          |
| Wang et al. 2020 [31]          | Li-O <sub>2</sub> , NMC | Electric vehicles       | Cradle to grave                               | Life cycle environmental assessment          |
| Cusenza et al. 2019 [32]       | NMC, LMO                | Plug-in hybrid vehicle  | Cradle to grave                               | Life cycle environmental analysis            |
| Vandepaer et al. 2019 [33]     | LFP                     | Grid storage            | Cradle to gate, End of Life                   | Life cycle environmental assessment          |
| Delgado et al. 2019 [34]       | NMC                     | Stationary storage      | Cradle to grave                               | Life cycle environmental assessment          |
| Dai et al., 2019 [35]          | NMC111                  | Automotive applications | Cradle to gate                                | Life cycle environmental assessment          |

|                              |               |                                                   |                               |                                        |
|------------------------------|---------------|---------------------------------------------------|-------------------------------|----------------------------------------|
| <b>Ryan et al. 2018 [36]</b> | LFP, NMC, NCA | Stationary storage<br>for frequency<br>regulation | Cradle to gate<br>End of life | Life cycle environmental<br>assessment |
|------------------------------|---------------|---------------------------------------------------|-------------------------------|----------------------------------------|

---

Table S3: Base-case contribution analysis results

| Process    | Contributor             | PMFP                      | FFP                  | FETP              | FEP                | GWP                  | HTPc             | HTPnc            | IRP                            | LOP                       | METP               | MEP                | SOP                 | OFHH                    | OFTE                 | ODP                         | TAP                              | TETP           | WCP              |
|------------|-------------------------|---------------------------|----------------------|-------------------|--------------------|----------------------|------------------|------------------|--------------------------------|---------------------------|--------------------|--------------------|---------------------|-------------------------|----------------------|-----------------------------|----------------------------------|----------------|------------------|
|            |                         | kg<br>PM2.5 <sub>eq</sub> | kg oil <sub>eq</sub> | kg 1,4-<br>DCB    | kg P <sub>eq</sub> | kg CO <sub>2eq</sub> | kg 1,4-<br>DCB   | kg 1,4-<br>DCB   | kBq<br>Co-<br>60 <sub>eq</sub> | m2a<br>crop <sub>eq</sub> | kg 1,4-<br>DCB     | kg N <sub>eq</sub> | kg Cu <sub>eq</sub> | kg<br>NOx <sub>eq</sub> | kg NOx <sub>eq</sub> | kg CFC-<br>11 <sub>eq</sub> | kg SO <sub>2</sub> <sub>eq</sub> | kg 1,4-<br>DCB | m <sup>3</sup>   |
| Mining     | Mining equipment        | 66.3<br>(73.6%)           | 539.34<br>(22.6%)    | 5.3<br>(0.27%)    | 0.1<br>(1%)        | 1957.9<br>(22.64%)   | 137.9<br>(12.6%) | 18843<br>(12.6%) | 1.08<br>(0.3%)                 | 2.24<br>(0.3%)            | 5.1<br>(0.3%)      | 0.9<br>(36.56%)    | 0.11<br>(0.3%)      | 6.31<br>(12.6%)         | 6.40<br>(12.6%)      | 0 (20.14%)                  | 15.6 (22.26%)                    | 0.1<br>(7.51%) | 1.7<br>(0.87%)   |
|            | Treatment of overburden | 0<br>(0%)                 | 0.00                 | 0<br>(0%)         | 0<br>(0%)          | 0 (0%)               | 0.00<br>(0%)     | 0.00<br>(0%)     | 0.00<br>(0%)                   | 0.00<br>(0%)              | 0 (0%)             | 0 (0%)             | 0<br>(0%)           | 0.00<br>(0%)            | 0.00<br>(0%)         | 0<br>(0%)                   | 0 (0%)                           | 0<br>(0%)      | 0 (0%)           |
| Processing | Magnesia                | 6.3<br>(6.97%)            | 510.20<br>(21.4%)    | 44.6<br>(2.24%)   | 0.1<br>(2.21%)     | 1852.1<br>(21.42%)   | 124.6<br>(11.4%) | 17019<br>(11.4%) | 0.68<br>(0.9%)                 | 1.40<br>(0.2%)            | 38.6<br>(2.23%)    | 0.3<br>(11.89%)    | 0.07<br>(0.2%)      | 5.70<br>(11.4%)         | 5.78<br>(11.4%)      | 0<br>(1.45%)                | 3.4<br>(4.78%)                   | 0.1<br>(6.48%) | 2.6<br>(1.36%)   |
|            | Sulfur                  | 2.3<br>(2.59%)            | 41.57<br>(1.7%)      | 2.4<br>(0.12%)    | 0<br>(0.15%)       | 150.9<br>(1.75%)     | 19.05<br>(1.7%)  | 2601<br>(1.7%)   | 5.51<br>(1.7%)                 | 11.44<br>(1.7%)           | 1.1<br>(0.06%)     | 0 (0.75%)          | 0.58<br>(1.7%)      | 0.87<br>(1.7%)          | 0.88<br>(1.7%)       | 0<br>(1.12%)                | 11.2 (16.01%)                    | 0<br>(3.67%)   | 0.2<br>(0.11%)   |
|            | Sodium hydroxide        | 0.2<br>(0.25%)            | 23.70<br>(0.9%)      | 2.9<br>(0.15%)    | 0<br>(0.68%)       | 86<br>(1%)           | 10.86<br>(0.9%)  | 1483<br>(0.9%)   | 3.14<br>(0%)                   | 6.52<br>(0%)              | 2.7<br>(0.15%)     | 0 (0.97%)          | 0.33<br>(0%)        | 0.50<br>(0.9%)          | 0.50<br>(0.9%)       | 0<br>(3.28%)                | 0.4<br>(0.55%)                   | 0<br>(0.62%)   | 2.3<br>(1.18%)   |
|            | Electricity production  | 0.1<br>(0.09%)            | 7.07<br>(0.3%)       | 0.5<br>(0.03%)    | 0<br>(0.09%)       | 25.7<br>(0.3%)       | 68.73<br>(6.3%)  | 9385<br>(6.3%)   | 0.94<br>(0%)                   | 1.94<br>(0%)              | 0.5<br>(0.03%)     | 0 (0.18%)          | 0.10<br>(0%)        | 3.14<br>(6.3%)          | 3.19<br>(6.3%)       | 0<br>(0.08%)                | 0.1<br>(0.12%)                   | 0<br>(0.18%)   | 115.7<br>(60.3%) |
|            | Lime                    | 0.1<br>(0.11%)            | 6.69<br>(0.3%)       | 1.1<br>(0.05%)    | 0<br>(0.15%)       | 24.3<br>(0.28%)      | 35.81<br>(3.2%)  | 4890<br>(3.2%)   | 0.89<br>(0%)                   | 1.84<br>(0%)              | 1<br>(0.06%)       | 0 (0.26%)          | 0.09<br>(0%)        | 1.64<br>(3.2%)          | 1.66<br>(3.2%)       | 0<br>(0.08%)                | 0.1<br>(0.21%)                   | 0<br>(0.63%)   | 0.5<br>(0.28%)   |
|            | Limestone               | 0.1<br>(0.13%)            | 1.16<br>(0%)         | 0 (0%)            | 0<br>(0.01%)       | 4.2<br>(0.05%)       | 55.11<br>(5%)    | 7525<br>(5%)     | 0.1(0%)                        | 0.32<br>(0%)              | 0 (0%)             | 0 (0.16%)          | 0.02<br>(0%)        | 2.52<br>(5%)            | 2.56<br>(5%)         | 0<br>(0.03%)                | 0.1<br>(0.1%)                    | 0<br>(0.06%)   | 0.1<br>(0.07%)   |
|            | Treatment of tailings   | 0<br>(0%)                 | 0.00<br>(0%)         | 1695.7<br>(85.2%) | 4.3<br>(70.13%)    | 0 (0%)               | 0.00<br>(0%)     | 0.00<br>(0%)     | 266.83<br>(84.5%)              | 554.31<br>(84.5%)         | 1460.7<br>(84.59%) | 0.1<br>(3.85%)     | 27.91<br>(84.59%)   | 0.00<br>(0%)            | 0.00<br>(0%)         | 0<br>(0%)                   | 0<br>(0%)                        | 0<br>(0.41%)   | 0<br>(0%)        |
|            | Sulfur dioxide          | 2.2<br>(2.43%)            | 0.00<br>(0%)         | 0<br>(0%)         | 0<br>(0%)          | 0 (0%)               | 0.00<br>(0%)     | 0.00<br>(0%)     | 0.00<br>(0%)                   | 0.00<br>(0%)              | 0 (0%)             | 0 (0%)             | 0.00<br>(0%)        | 0.00<br>(0%)            | 0.00<br>(0%)         | 0<br>(0%)                   | 10.9 (15.6%)                     | 0 (0%)         | 0 (0%)           |
|            | Transportation          | 1.88<br>(2.09%)           | 134.15<br>(5.6%)     | 3.04<br>(0.15%)   | 0.03<br>(0.51%)    | 486.99<br>(5.63%)    | 61.47<br>(5.6%)  | 8394<br>(5.6%)   | 0.18<br>(0%)                   | 0.37<br>(0%)              | 4.17<br>(0.24%)    | 0.17<br>(6.63%)    | 0.02<br>(6.63%)     | 2.81<br>(5.6%)          | 2.85<br>(5.6%)       | 0<br>(5.21%)                | 4.69 (6.69%)                     | 0.21<br>(19%)  | 0.69<br>(0.36%)  |
|            | Refining                | 3.6<br>(3.96%)            | 369.94<br>(15.5%)    | 46<br>(2.31%)     | 0.7<br>(10.62%)    | 1342.9<br>(15.53%)   | 169.5<br>(15.5%) | 23148<br>(15.5%) | 0.49<br>(0%)                   | 1.02<br>(0%)              | 41.5<br>(2.41%)    | 0.4<br>(15.16%)    | 0.05<br>(0%)        | 7.75<br>(15.5%)         | 7.86<br>(15.5%)      | 0 (51.27%)                  | 6.1<br>(8.66%)                   | 0.1 (9.68%)    | 35.3<br>(18.42%) |
| Refining   | Electricity production  | 2.7<br>(2.97%)            | 336.76<br>(14.1%)    | 10.9<br>(0.55%)   | 0.2<br>(3.79%)     | 1222.5<br>(14.14%)   | 154.3<br>(14.1%) | 21072<br>(14.1%) | 0.45<br>(0%)                   | 0.93<br>(0%)              | 10.1<br>(0.58%)    | 0.2<br>(7.51%)     | 0.05<br>(0%)        | 7.06<br>(14.1%)         | 7.16<br>(14.1%)      | 0<br>(0.28%)                | 5.1<br>(7.28%)                   | 0<br>(2.43%)   | 3.1<br>(1.64%)   |
|            | Hydrochloric acid       | 1.4<br>(1.59%)            | 133.44<br>(5.6%)     | 33.2<br>(1.67%)   | 0.2<br>(3.86%)     | 484.4<br>(5.6%)      | 61.15<br>(5.6%)  | 8349<br>(5.6%)   | 17.67<br>(5.6%)                | 36.71<br>(5.6%)           | 31.8<br>(1.84%)    | 0.1 (5.1%)         | 1.85<br>(5.6%)      | 2.80<br>(5.6%)          | 2.84<br>(5.6%)       | 0<br>(11.6%)                | 2.9<br>(4.1%)                    | 0.3 (25.74%)   | 10.7<br>(5.55%)  |
|            | Heat                    | 0.2<br>(0.18%)            | 113.87<br>(4.8%)     | 1.7<br>(0.08%)    | 0<br>(0.09%)       | 413.4<br>(4.78%)     | 52.18<br>(4.7%)  | 7125<br>(4.7%)   | 1.51<br>(0%)                   | 3.13<br>(0%)              | 1<br>(0.06%)       | 0 (0.72%)          | 0.16<br>(0%)        | 2.39<br>(4.7%)          | 2.42<br>(4.7%)       | 0<br>(2.32%)                | 0.5<br>(0.7%)                    | 0<br>(1.4%)    | 0.6<br>(0.29%)   |
|            | Ammonium bicarbonate    | 0.6<br>(0.64%)            | 100.25<br>(4.2%)     | 10.7<br>(0.54%)   | 0.1<br>(1.63%)     | 363.9<br>(4.21%)     | 45.94<br>(4.2%)  | 6273<br>(4.2%)   | 13.28<br>(4.2%)                | 27.58<br>(4.2%)           | 9.4<br>(0.55%)     | 0.1<br>(2.76%)     | 1.39<br>(4.2%)      | 2.10<br>(4.2%)          | 2.13<br>(4.2%)       | 0<br>(0.67%)                | 1.2<br>(1.65%)                   | 0<br>(4.23%)   | 3.9<br>(2.05%)   |
|            | Sulfuric acid           | 2<br>(2.21%)              | 44.17<br>(1.8%)      | 129.6<br>(6.51%)  | 0.3<br>(4.72%)     | 160.3<br>(1.85%)     | 20.24<br>(1.8%)  | 2764<br>(1.8%)   | 0.58<br>(0%)                   | 1.22<br>(0%)              | 117.2<br>(6.79%)   | 0.1 (2.9%)         | 0.06<br>(0%)        | 0.93<br>(1.8%)          | 0.94<br>(1.8%)       | 0<br>(0.88%)                | 7.5 (10.75%)                     | 0.2 (17.24%)   | 13.2<br>(6.87%)  |
|            | Soda ash                | 0.1<br>(0.08%)            | 11.51<br>(0.3%)      | 1.5<br>(0.08%)    | 0<br>(0.21%)       | 41.8<br>(0.48%)      | 5.27<br>(0%)     | 720.06<br>(0%)   | 1.52<br>(0%)                   | 3.17<br>(0%)              | 1.4<br>(0.08%)     | 0.1<br>(4.25%)     | 0.16<br>(0%)        | 0.24<br>(0%)            | 0.24<br>(0%)         | 0<br>(0.11%)                | 0.2<br>(0.24%)                   | 0<br>(0.4%)    | 0.8<br>(0.39%)   |
|            | Sodium metabisulfite    | 0<br>(0.05%)              | 4.56 (0%)            | 0.6<br>(0.03%)    | 0<br>(0.13%)       | 16.5<br>(0.19%)      | 2.09<br>(0%)     | 285.06<br>(0%)   | 0.60<br>(0%)                   | 1.25<br>(0%)              | 0.5<br>(0.03%)     | 0 (0.19%)          | 0.06<br>(0%)        | 0.10<br>(0%)            | 0.10<br>(0%)         | 0<br>(0.63%)                | 0.1<br>(0.11%)                   | 0<br>(0.12%)   | 0.4<br>(0.23%)   |
|            | Kerosene                | 0<br>(0.03%)              | 2.40<br>(0%)         | 0.1<br>(0%)       | 0<br>(0.01%)       | 8.7<br>(0.1%)        | 66.59<br>(6.1%)  | 9093<br>(6.1%)   | 0.32<br>(0%)                   | 0.66<br>(0%)              | 0.1<br>(0%)        | 0 (0.07%)          | 0.03<br>(0%)        | 3.04<br>(0%)            | 3.09<br>(0%)         | 0<br>(0.74%)                | 0.1<br>(0.12%)                   | 0<br>(0.15%)   | 0<br>(0.01%)     |
|            | Lime                    | 0<br>(0%)                 | 0.10<br>(0%)         | 0<br>(0%)         | 0<br>(0%)          | 0.4<br>(0%)          | 0.05<br>(0%)     | 6.33<br>(0%)     | 0.01<br>(0%)                   | 0.03<br>(0%)              | 0<br>(0%)          | 0 (0%)             | 0.00<br>(0%)        | 0.00<br>(0%)            | 0.00<br>(0%)         | 0<br>(0%)                   | 0 (0%)                           | 0<br>(0.01%)   | 0<br>(0%)        |
|            | Limestone               | 0<br>(0%)                 | 0.02<br>(0%)         | 0<br>(0%)         | 0<br>(0%)          | 0.1<br>(0%)          | 0.01<br>(0%)     | 1.02<br>(0%)     | 0.00<br>(0%)                   | 0.00<br>(0%)              | 0<br>(0%)          | 0 (0%)             | 0.00<br>(0%)        | 0.00<br>(0%)            | 0.00<br>(0%)         | 0<br>(0%)                   | 0 (0%)                           | 0 (0%)         | 0<br>(0%)        |
|            | Disposal                | 0<br>(0.02%)              | 1.18<br>(0%)         | 0<br>(0%)         | 0<br>(0%)          | 4.3<br>(0.05%)       | 0.54<br>(0%)     | 73.75<br>(0%)    | 0.16<br>(0%)                   | 0.32<br>(0%)              | 0<br>(0%)          | 0 (0.07%)          | 0.02<br>(0%)        | 0.02<br>(0%)            | 0.03<br>(0%)         | 0<br>(0.1%)                 | 0 (0.05%)                        | 0<br>(0.04%)   | 0<br>(0.01%)     |
|            | Total                   | 31.48                     | 2382.09              | 3714              | 6.18               | 8647.26              | 1091             | 149057           | 315.44                         | 655.29                    | 4730.5             | 0.22               | 33.00               | 49.91                   | 50.62                | 0.00                        | 65.69                            | 54741          | 273.11           |

**Table S4: LCA results for mining and processing with varying ore grades**

| Ore Grade<br>(% Co) | PMFP                   | FFP                  | FETP       | FEP                | GWP                  | HTPc       | HTPnc      | IRP                     | LOP                                 | METP       | MEP                | SOP                 | OFHH                             | OFTE                             | ODP                     | TAP                              | TETP       | WCP            |
|---------------------|------------------------|----------------------|------------|--------------------|----------------------|------------|------------|-------------------------|-------------------------------------|------------|--------------------|---------------------|----------------------------------|----------------------------------|-------------------------|----------------------------------|------------|----------------|
| Unit                | kg PM2.5 <sub>eq</sub> | kg oil <sub>eq</sub> | kg 1,4-DCB | kg P <sub>eq</sub> | kg CO <sub>2eq</sub> | kg 1,4-DCB | kg 1,4-DCB | kBq Co-60 <sub>eq</sub> | m <sup>2</sup> a crop <sub>eq</sub> | kg 1,4-DCB | kg N <sub>eq</sub> | kg Cu <sub>eq</sub> | kg NO <sub>x</sub> <sub>eq</sub> | kg NO <sub>x</sub> <sub>eq</sub> | kg CFC-11 <sub>eq</sub> | kg SO <sub>2</sub> <sub>eq</sub> | kg 1,4-DCB | m <sup>3</sup> |
| 0.05%               | 29.0                   | 1563.9               | 4181.6     | 5.3                | 13606.8              | 2092.4     | 180322     | 229.2                   | 634.4                               | 5397.1     | 0.1                | 8.7                 | 42.8                             | 43.5                             | 0.0027                  | 52.7                             | 11011.0    | 214.4          |
| 0.10%               | 23.7                   | 1238.0               | 3673.4     | 4.9                | 7988.5               | 1320.4     | 156361     | 133.1                   | 592.7                               | 4697.4     | 0.1                | 6.7                 | 34.4                             | 34.9                             | 0.0020                  | 43.8                             | 7312.0     | 202.9          |
| 0.15%               | 21.8                   | 1121.1               | 3503.8     | 4.7                | 6094.1               | 1062.1     | 148369     | 100.8                   | 573.9                               | 4463.9     | 0.1                | 5.9                 | 31.3                             | 31.8                             | 0.0018                  | 40.5                             | 6046.0     | 197.3          |
| 0.20%               | 20.7                   | 1056.6               | 3418.9     | 4.7                | 5131.4               | 932.4      | 144370     | 84.4                    | 561.0                               | 4346.9     | 0.1                | 5.5                 | 29.6                             | 30.1                             | 0.0017                  | 38.7                             | 5389.3     | 193.3          |
| 0.25%               | 20.0                   | 1013.4               | 3367.8     | 4.6                | 4541.8               | 854.1      | 141967     | 74.3                    | 550.5                               | 4276.6     | 0.1                | 5.3                 | 28.5                             | 29.0                             | 0.0016                  | 37.4                             | 4977.0     | 189.9          |
| 0.30%               | 19.4                   | 980.8                | 3333.7     | 4.6                | 4139.1               | 801.4      | 140363     | 67.5                    | 541.4                               | 4229.6     | 0.1                | 5.1                 | 27.6                             | 28.1                             | 0.0015                  | 36.4                             | 4687.6     | 186.8          |
| 0.35%               | 18.9                   | 954.5                | 3309.2     | 4.6                | 3843.7               | 763.5      | 139216     | 62.5                    | 533.1                               | 4195.9     | 0.1                | 4.9                 | 26.9                             | 27.4                             | 0.0015                  | 35.5                             | 4468.8     | 184.0          |
| 0.40%               | 18.5                   | 932.3                | 3290.8     | 4.6                | 3615.4               | 734.9      | 138353     | 58.6                    | 525.3                               | 4170.5     | 0.0                | 4.8                 | 26.3                             | 26.8                             | 0.0015                  | 34.8                             | 4294.7     | 181.4          |
| 0.45%               | 18.2                   | 912.8                | 3276.5     | 4.6                | 3432.2               | 712.3      | 137681     | 55.5                    | 518.0                               | 4150.7     | 0.0                | 4.7                 | 25.8                             | 26.2                             | 0.0014                  | 34.2                             | 4150.6     | 178.9          |
| 0.50%               | 17.8                   | 895.3                | 3264.9     | 4.5                | 3280.8               | 694.1      | 137143     | 52.9                    | 511.1                               | 4134.8     | 0.0                | 4.6                 | 25.3                             | 25.7                             | 0.0014                  | 33.6                             | 4027.8     | 176.5          |
| 0.55%               | 17.5                   | 879.4                | 3255.5     | 4.5                | 3152.5               | 679.0      | 136701     | 50.8                    | 504.4                               | 4121.8     | 0.0                | 4.5                 | 24.9                             | 25.3                             | 0.0014                  | 33.0                             | 3920.8     | 174.2          |
| 0.60%               | 17.3                   | 864.6                | 3247.5     | 4.5                | 3041.9               | 666.2      | 136332     | 48.9                    | 498.0                               | 4110.9     | 0.0                | 4.4                 | 24.5                             | 24.9                             | 0.0013                  | 32.5                             | 3825.8     | 171.9          |
| 0.65%               | 17.0                   | 850.8                | 3240.8     | 4.5                | 2944.9               | 655.3      | 136019     | 47.3                    | 491.8                               | 4101.6     | 0.0                | 4.4                 | 24.1                             | 24.5                             | 0.0013                  | 32.0                             | 3740.3     | 169.8          |
| 0.70%               | 16.7                   | 837.8                | 3235.0     | 4.5                | 2858.7               | 645.9      | 135750     | 45.9                    | 485.8                               | 4093.5     | 0.0                | 4.3                 | 23.7                             | 24.1                             | 0.0013                  | 31.6                             | 3662.4     | 167.7          |
| 0.75%               | 16.5                   | 825.5                | 3229.9     | 4.5                | 2781.3               | 637.5      | 135516     | 44.6                    | 480.0                               | 4086.6     | 0.0                | 4.2                 | 23.4                             | 23.8                             | 0.0013                  | 31.1                             | 3590.8     | 165.6          |
| 0.80%               | 16.3                   | 813.8                | 3225.5     | 4.5                | 2711.1               | 630.2      | 135311     | 43.4                    | 474.3                               | 4080.4     | 0.0                | 4.2                 | 23.0                             | 23.4                             | 0.0013                  | 30.7                             | 3524.3     | 163.6          |
| 0.85%               | 16.1                   | 802.6                | 3221.6     | 4.5                | 2646.9               | 623.6      | 135130     | 42.4                    | 468.8                               | 4075.0     | 0.0                | 4.1                 | 22.7                             | 23.1                             | 0.0012                  | 30.3                             | 3462.2     | 161.7          |
| 0.90%               | 15.9                   | 791.9                | 3218.0     | 4.5                | 2587.8               | 617.6      | 134968     | 41.4                    | 463.5                               | 4070.1     | 0.0                | 4.1                 | 22.4                             | 22.8                             | 0.0012                  | 29.9                             | 3403.9     | 159.8          |
| 0.95%               | 15.7                   | 781.5                | 3214.9     | 4.5                | 2533.0               | 612.2      | 134823     | 40.5                    | 458.3                               | 4065.7     | 0.0                | 4.0                 | 22.1                             | 22.5                             | 0.0012                  | 29.6                             | 3349.0     | 158.0          |
| 1%                  | 15.5                   | 771.6                | 3212.0     | 4.5                | 2482.0               | 607.3      | 134691     | 39.6                    | 453.2                               | 4061.8     | 0.0                | 3.9                 | 21.9                             | 22.2                             | 0.0012                  | 29.2                             | 3296.8     | 156.2          |

**Table S5: LCA results for three different battery chemistries for an ore grade of 0.3% and a refining location in China**

| LIB                | PMFP                      | FFP          | FETP           | FEP        | GWP                  | HTPc           | HTPnc          | IRP                         | LOP                                    | METP           | ME<br>P    | SOP         | OFH<br>H                 | OFTE                     | ODP             | TAP                   | TETP           | WCP            |
|--------------------|---------------------------|--------------|----------------|------------|----------------------|----------------|----------------|-----------------------------|----------------------------------------|----------------|------------|-------------|--------------------------|--------------------------|-----------------|-----------------------|----------------|----------------|
|                    | kg<br>PM2.5 <sub>eq</sub> | kg oil<br>eq | kg 1,4-<br>DCB | kg P<br>eq | kg CO <sub>2eq</sub> | kg 1,4-<br>DCB | kg 1,4-<br>DCB | kBq Co-<br>60 <sub>eq</sub> | m <sup>2</sup> a<br>crop <sub>eq</sub> | kg 1,4-<br>DCB | kg N<br>eq | kg Cu<br>eq | kg NO <sub>x</sub><br>eq | kg NO <sub>x</sub><br>eq | kg CFC-11<br>eq | kg SO <sub>2</sub> eq | kg 1,4-<br>DCB | m <sup>3</sup> |
| <b>NMC1<br/>11</b> | 31.48                     | 2383         | 3714.91        | 6.18       | 8647.2               | 1091.54        | 149057         | 315.4                       | 655.29                                 | 4730.5         | 0.22       | 33.0        | 49.91                    | 50.62                    | 0.00            | 65.6                  | 54741.6        | 273.1          |
| <b>NMC5<br/>32</b> | 19.21                     | 1427         | 2226.07        | 3.69       | 5189.80              | 648.67         | 88245.         | 187.5                       | 389.14                                 | 2837.5         | 0.14       | 19.6        | 29.83                    | 30.25                    | 0.00            | 39.9                  | 33171.9        | 164.9          |
| <b>NMC6<br/>22</b> | 15.91                     | 1186         | 1840.10        | 3.05       | 4287.2               | 537.10         | 72922.         | 155.3                       | 322.08                                 | 2345.6         | 0.11       | 16.3        | 24.78                    | 25.13                    | 0.00            | 33.1                  | 27638.9        | 136.3          |
| <b>NMC8<br/>11</b> | 8.39                      | 639.1        | 962.76         | 1.60       | 2230.5               | 283.58         | 38088.         | 82.15                       | 169.68                                 | 1227.5         | 0.06       | 8.68        | 13.31                    | 13.50                    | 0.00            | 17.50                 | 15078.0        | 71.25          |
| <b>NCA</b>         | 11.98                     | 902.4        | 1378.40        | 2.28       | 3211.2               | 404.17         | 54589.         | 117.0                       | 242.53                                 | 1757.3         | 0.08       | 12.3        | 18.85                    | 19.12                    | 0.00            | 24.98                 | 21223.6        | 102.0          |

**Table S6: LCA results for the combined scenarios**

| #  | Grade | Refining<br>Location | LIB | PMFP                      | FFP          | FETP           | FEP        | GWP                  | HTPc           | HTPnc          | IRP                        | LOP                                    | METP           | MEP        | SO<br>P     | OFH<br>H                 | OFTE                     | ODP              | TAP                      | TETP           | WCP            |
|----|-------|----------------------|-----|---------------------------|--------------|----------------|------------|----------------------|----------------|----------------|----------------------------|----------------------------------------|----------------|------------|-------------|--------------------------|--------------------------|------------------|--------------------------|----------------|----------------|
|    |       |                      |     | kg<br>PM2.5 <sub>eq</sub> | kg oil<br>eq | kg 1,4-<br>DCB | kg P<br>eq | kg CO <sub>2eq</sub> | kg 1,4-<br>DCB | kg 1,4-<br>DCB | kBq<br>Co-60 <sub>eq</sub> | m <sup>2</sup> a<br>crop <sub>eq</sub> | kg 1,4-<br>DCB | kg N<br>eq | kg<br>Cu eq | kg NO <sub>x</sub><br>eq | kg NO <sub>x</sub><br>eq | kg CFC-<br>11 eq | kg<br>SO <sub>2</sub> eq | kg 1,4-<br>DCB | m <sup>3</sup> |
| 1  | 0.1   | 0.75                 | 394 | 33.67                     | 2640.35      | 3842.98        | 6.29       | 13208.6              | 1610.57        | 165058         | 381.13                     | 706.63                                 | 4906.93        | 0.23       | 34.5        | 56.66                    | 57.47                    | 0.00             | 69.56                    | 55836.5        | 284.98         |
| 2  | 0.2   | 0.75                 | 394 | 32.35                     | 2458.91      | 3757.76        | 6.22       | 9958                 | 1222.51        | 153064         | 332.33                     | 674.90                                 | 4789.56        | 0.23       | 33.4        | 51.93                    | 52.67                    | 0.00             | 67.25                    | 55134.6        | 278.55         |
| 3  | 0.3   | 0.75                 | 394 | 31.48                     | 2383.09      | 3714.91        | 6.18       | 8647.2               | 1091.54        | 149057         | 315.44                     | 655.29                                 | 4730.51        | 0.22       | 33.0        | 49.91                    | 50.62                    | 0.00             | 65.69                    | 54741.6        | 273.11         |
| 4  | 0.4   | 0.75                 | 394 | 30.80                     | 2334.55      | 3689.01        | 6.16       | 8499.89              | 1024.94        | 147047         | 306.56                     | 639.23                                 | 4694.82        | 0.22       | 32.7        | 48.60                    | 49.29                    | 0.00             | 64.46                    | 54474.7        | 268.19         |
| 5  | 0.5   | 0.75                 | 394 | 30.22                     | 2297.57      | 3671.61        | 6.14       | 8260.95              | 984.15         | 145836         | 300.92                     | 624.96                                 | 4670.82        | 0.22       | 32.5        | 47.59                    | 48.27                    | 0.00             | 63.40                    | 54272.7        | 263.64         |
| 6  | 0.6   | 0.75                 | 394 | 29.71                     | 2266.84      | 3659.06        | 6.13       | 8077.73              | 956.32         | 145025         | 296.91                     | 611.87                                 | 4653.51        | 0.22       | 32.3        | 46.75                    | 47.41                    | 0.00             | 62.46                    | 54109.3        | 259.37         |
| 7  | 0.7   | 0.75                 | 394 | 29.52                     | 2240.06      | 3649.56        | 6.12       | 7930.08              | 935.93         | 144443         | 293.85                     | 599.67                                 | 4640.40        | 0.22       | 32.2        | 46.01                    | 46.66                    | 0.00             | 61.60                    | 53971.1        | 255.35         |
| 8  | 0.8   | 0.75                 | 394 | 29.11                     | 2216.03      | 3644.30        | 6.11       | 7892.3               | 920.22         | 144004         | 291.39                     | 588.21                                 | 4635.30        | 0.22       | 32.0        | 45.34                    | 45.98                    | 0.00             | 61.20                    | 53912.2        | 253.40         |
| 9  | 0.9   | 0.75                 | 394 | 28.82                     | 2194.09      | 3642.10        | 6.11       | 7806.78              | 907.66         | 143660         | 289.35                     | 577.37                                 | 4630.09        | 0.22       | 31.9        | 44.73                    | 45.36                    | 0.00             | 60.81                    | 53850.7        | 251.54         |
| 10 | 1.0   | 0.75                 | 394 | 28.43                     | 2173.80      | 3636.06        | 6.10       | 7701.02              | 897.32         | 143384         | 287.60                     | 567.09                                 | 4621.75        | 0.22       | 31.8        | 44.16                    | 44.78                    | 0.00             | 60.08                    | 53743.6        | 247.91         |
| 11 | 0.1   | 0.18                 | 394 | 34.67                     | 2617.50      | 4114.11        | 6.34       | 12575.9              | 1608.22        | 164973         | 1028.6                     | 714.55                                 | 5280.87        | 0.26       | 36.5        | 53.52                    | 54.35                    | 0.01             | 70.48                    | 65110.5        | 327.92         |



|    |     |      |     |       |         |         |      |         |         |         |        |         |         |      |           |       |       |      |       |         |        |
|----|-----|------|-----|-------|---------|---------|------|---------|---------|---------|--------|---------|---------|------|-----------|-------|-------|------|-------|---------|--------|
| 12 | 0.2 | 0.18 | 394 | 31.65 | 2436.07 | 3859.53 | 6.13 | 9718.21 | 1220.16 | 152979  | 979.82 | 682.82  | 4930.33 | 0.24 | 35.4      | 48.78 | 49.55 | 0.00 | 65.33 | 63187.4 | 318.29 |
| 13 | 0.3 | 0.18 | 394 | 30.34 | 2360.24 | 3774.31 | 6.06 | 8325.76 | 1089.19 | 148972  | 962.93 | 663.20  | 4812.96 | 0.24 | 34.9      | 46.77 | 47.51 | 0.00 | 63.03 | 62485.6 | 311.86 |
| 14 | 0.4 | 0.18 | 394 | 29.47 | 2311.71 | 3731.46 | 6.02 | 8201.93 | 1022.59 | 146961  | 954.06 | 647.14  | 4753.92 | 0.23 | 34.7      | 45.46 | 46.18 | 0.00 | 61.47 | 62092.6 | 306.42 |
| 15 | 0.5 | 0.18 | 394 | 28.78 | 2274.72 | 3705.56 | 6.00 | 7867.2  | 981.80  | 145751  | 948.41 | 632.87  | 4718.22 | 0.23 | 34.4      | 44.45 | 45.15 | 0.00 | 60.23 | 61825.7 | 301.50 |
| 16 | 0.6 | 0.18 | 394 | 28.21 | 2244.00 | 3688.16 | 5.98 | 7628.26 | 953.97  | 144940  | 944.40 | 619.78  | 4694.22 | 0.23 | 34.3      | 43.60 | 44.29 | 0.00 | 59.17 | 61623.7 | 296.95 |
| 17 | 0.7 | 0.18 | 394 | 27.70 | 2217.21 | 3675.61 | 5.97 | 7445.04 | 933.58  | 144358  | 941.34 | 607.59  | 4676.91 | 0.23 | 34.1      | 42.86 | 43.54 | 0.00 | 58.23 | 61460.2 | 292.69 |
| 18 | 0.8 | 0.18 | 394 | 27.23 | 2193.19 | 3666.11 | 5.96 | 7297.39 | 917.87  | 143919  | 938.89 | 596.12  | 4663.80 | 0.23 | 34        | 42.19 | 42.86 | 0.00 | 57.38 | 61322   | 288.66 |
| 19 | 0.9 | 0.18 | 394 | 26.81 | 2171.25 | 3658.65 | 5.95 | 7174.09 | 905.31  | 143575  | 936.84 | 585.29  | 4653.49 | 0.23 | 33.9<br>3 | 41.58 | 42.24 | 0.00 | 56.59 | 61201.7 | 284.85 |
| 20 | 1.0 | 0.18 | 394 | 26.41 | 2150.95 | 3652.61 | 5.95 | 7068.33 | 894.98  | 143299  | 935.10 | 575.00  | 4645.15 | 0.23 | 33.8      | 41.01 | 41.66 | 0.00 | 55.85 | 61094.5 | 281.22 |
| 21 | 0.1 | 0.29 | 394 | 34.09 | 2529.16 | 3867.41 | 6.12 | 12119   | 1549.13 | 160484  | 787.43 | 15536.4 | 4960.34 | 0.24 | 20.1      | 51.16 | 51.94 | 0.01 | 70.11 | 35698.6 | 308.63 |
| 22 | 0.2 | 0.29 | 394 | 31.07 | 2347.73 | 3612.83 | 5.91 | 9261.23 | 1161.08 | 148490  | 738.62 | 15504.7 | 4609.80 | 0.23 | 18.9      | 46.42 | 47.14 | 0.00 | 64.96 | 33775.5 | 299.01 |
| 23 | 0.3 | 0.29 | 394 | 29.76 | 2271.90 | 3527.61 | 5.84 | 8068.78 | 1030.11 | 144483  | 721.73 | 15485.1 | 4492.44 | 0.22 | 18.4      | 44.41 | 45.10 | 0.00 | 62.65 | 33073.7 | 292.58 |
| 24 | 0.4 | 0.29 | 394 | 28.89 | 2223.37 | 3484.76 | 5.81 | 7744.95 | 963.51  | 142473  | 712.86 | 15469.0 | 4433.39 | 0.22 | 18.2      | 43.10 | 43.77 | 0.00 | 61.10 | 32680.7 | 287.14 |
| 25 | 0.5 | 0.29 | 394 | 28.20 | 2186.38 | 3458.86 | 5.78 | 7410.22 | 922.72  | 141262  | 707.21 | 15454.8 | 4397.70 | 0.22 | 18        | 42.09 | 42.74 | 0.00 | 59.86 | 32413.8 | 282.22 |
| 26 | 0.6 | 0.29 | 394 | 27.63 | 2155.66 | 3441.46 | 5.77 | 7171.28 | 894.88  | 140451  | 703.20 | 15441.7 | 4373.70 | 0.22 | 17.8      | 41.24 | 41.89 | 0.00 | 58.80 | 32211.8 | 277.67 |
| 27 | 0.7 | 0.29 | 394 | 27.12 | 2128.87 | 3428.92 | 5.75 | 6988.06 | 874.49  | 139869  | 700.14 | 15429.5 | 4356.39 | 0.21 | 17.6      | 40.50 | 41.13 | 0.00 | 57.86 | 32048.4 | 273.40 |
| 28 | 0.8 | 0.29 | 394 | 26.65 | 2104.85 | 3419.42 | 5.74 | 6840.41 | 858.79  | 139430  | 697.69 | 15418   | 4343.27 | 0.21 | 17.5      | 39.83 | 40.45 | 0.00 | 57.01 | 31910.2 | 269.38 |
| 29 | 0.9 | 0.29 | 394 | 26.23 | 2082.91 | 3411.95 | 5.73 | 6717.11 | 846.23  | 139087  | 695.64 | 15407.2 | 4332.96 | 0.21 | 17.4      | 39.22 | 39.83 | 0.00 | 56.21 | 31789.8 | 265.57 |
| 30 | 1.0 | 0.29 | 394 | 25.83 | 2062.61 | 3405.92 | 5.73 | 6611.35 | 835.89  | 138810  | 693.90 | 15396.9 | 4324.62 | 0.21 | 17.3      | 38.65 | 39.25 | 0.00 | 55.48 | 31682.7 | 261.94 |
| 31 | 0.1 | 0.75 | 230 | 21.78 | 1579.06 | 2427.16 | 3.85 | 6426.54 | 955.84  | 97715.8 | 226.45 | 419.53  | 3114.45 | 0.15 | 20.6      | 33.82 | 34.30 | 0.00 | 44.38 | 34725.4 | 174.45 |
| 32 | 0.2 | 0.75 | 230 | 19.99 | 1471.68 | 2276.50 | 3.73 | 5734.8  | 726.18  | 90617.5 | 197.57 | 400.75  | 2906.99 | 0.14 | 19.9      | 31.02 | 31.46 | 0.00 | 41.33 | 33587.2 | 168.75 |
| 33 | 0.3 | 0.75 | 230 | 19.21 | 1426.81 | 2226.07 | 3.69 | 5189.80 | 648.67  | 88245.8 | 187.58 | 389.14  | 2837.53 | 0.14 | 19.6      | 29.83 | 30.25 | 0.00 | 39.97 | 33171.9 | 164.95 |
| 34 | 0.4 | 0.75 | 230 | 18.70 | 1398.08 | 2200.70 | 3.66 | 4837.87 | 609.25  | 87056.2 | 182.32 | 379.64  | 2802.58 | 0.13 | 19.5      | 29.05 | 29.47 | 0.00 | 39.05 | 32939.3 | 161.73 |
| 35 | 0.5 | 0.75 | 230 | 18.29 | 1376.20 | 2185.38 | 3.65 | 4639.77 | 585.11  | 86339.6 | 178.98 | 371.19  | 2781.46 | 0.13 | 19.3      | 28.45 | 28.86 | 0.00 | 38.31 | 32781.3 | 158.82 |
| 36 | 0.6 | 0.75 | 230 | 17.95 | 1358.01 | 2175.08 | 3.64 | 4498.36 | 568.64  | 85859.7 | 176.61 | 363.44  | 2767.25 | 0.13 | 19.2      | 27.95 | 28.35 | 0.00 | 37.69 | 32661.8 | 156.13 |
| 37 | 0.7 | 0.75 | 230 | 17.65 | 1342.16 | 2167.65 | 3.63 | 4389.92 | 556.57  | 85515.1 | 174.80 | 356.23  | 2757.01 | 0.13 | 19.2      | 27.51 | 27.90 | 0.00 | 37.13 | 32565.0 | 153.60 |
| 38 | 0.8 | 0.75 | 230 | 17.38 | 1327.94 | 2162.03 | 3.63 | 4302.54 | 547.28  | 85255.3 | 173.34 | 349.44  | 2749.25 | 0.13 | 19.1      | 27.12 | 27.50 | 0.00 | 36.63 | 32483.3 | 151.22 |
| 39 | 0.9 | 0.75 | 230 | 17.12 | 1314.95 | 2157.61 | 3.62 | 4229.57 | 539.84  | 85052.1 | 172.13 | 343.03  | 2743.15 | 0.13 | 19.0      | 26.76 | 27.13 | 0.00 | 36.16 | 32412   | 148.96 |
| 40 | 1.0 | 0.75 | 230 | 16.89 | 1302.94 | 2154.04 | 3.62 | 4166.98 | 533.73  | 84888.5 | 171.10 | 336.94  | 2738.21 | 0.13 | 18.2      | 26.42 | 26.79 | 0.00 | 35.72 | 32348.6 | 146.82 |
| 41 | 0.1 | 0.18 | 230 | 21.22 | 1655.18 | 2439.93 | 3.88 | 6193.42 | 966.87  | 97916.8 | 231.53 | 430.18  | 3132.48 | 0.15 | 21.1      | 32.44 | 32.93 | 0.00 | 42.89 | 38853.3 | 175.04 |
| 42 | 0.2 | 0.18 | 230 | 19.43 | 1547.79 | 2289.25 | 3.76 | 5480.02 | 737.18  | 90817.4 | 202.64 | 411.40  | 2924.99 | 0.14 | 20.4      | 29.64 | 30.09 | 0.00 | 39.84 | 37715.0 | 169.35 |

|    |     |      |     |       |         |         |      |         |         |         |        |         |         |      |      |       |       |      |       |         |        |
|----|-----|------|-----|-------|---------|---------|------|---------|---------|---------|--------|---------|---------|------|------|-------|-------|------|-------|---------|--------|
| 43 | 0.3 | 0.18 | 230 | 18.66 | 1502.91 | 2238.81 | 3.71 | 4944.38 | 659.66  | 88445.4 | 192.64 | 399.79  | 2855.52 | 0.14 | 20.2 | 28.45 | 28.88 | 0.00 | 38.48 | 37299.6 | 165.54 |
| 44 | 0.4 | 0.18 | 230 | 18.14 | 1474.18 | 2213.44 | 3.69 | 4603.11 | 620.23  | 87255.6 | 187.39 | 390.28  | 2820.57 | 0.14 | 20.0 | 27.67 | 28.09 | 0.00 | 37.55 | 37067   | 162.32 |
| 45 | 0.5 | 0.18 | 230 | 17.74 | 1452.29 | 2198.11 | 3.68 | 4410.51 | 596.09  | 86538.9 | 184.05 | 381.84  | 2799.45 | 0.14 | 19.9 | 27.08 | 27.49 | 0.00 | 36.82 | 36909   | 159.41 |
| 46 | 0.6 | 0.18 | 230 | 17.39 | 1434.10 | 2187.81 | 3.67 | 4273.30 | 579.61  | 86058.9 | 181.67 | 374.09  | 2785.24 | 0.14 | 19.8 | 26.58 | 26.98 | 0.00 | 36.20 | 36789.4 | 156.72 |
| 47 | 0.7 | 0.18 | 230 | 17.09 | 1418.25 | 2180.38 | 3.66 | 4136.09 | 567.54  | 85714.3 | 179.86 | 366.87  | 2775.00 | 0.14 | 19.7 | 26.14 | 26.53 | 0.00 | 35.64 | 36692.7 | 154.19 |
| 48 | 0.8 | 0.18 | 230 | 16.82 | 1404.03 | 2174.76 | 3.65 | 4051.56 | 558.25  | 85454.5 | 178.41 | 360.08  | 2767.23 | 0.14 | 19.6 | 25.74 | 26.13 | 0.00 | 35.13 | 36610.9 | 151.81 |
| 49 | 0.9 | 0.18 | 230 | 16.57 | 1391.04 | 2170.34 | 3.65 | 3981.05 | 550.81  | 85251.2 | 177.20 | 353.67  | 2761.13 | 0.14 | 19.6 | 25.38 | 25.76 | 0.00 | 34.67 | 36539.6 | 149.55 |
| 50 | 1.0 | 0.18 | 230 | 10.16 | 1340.23 | 2132.92 | 3.58 | 3920.63 | 530.87  | 83634.1 | 159.21 | 173.74  | 2709.02 | 0.13 | 17.9 | 25.30 | 25.67 | 0.00 | 33.59 | 35124.9 | 85.65  |
| 51 | 0.1 | 0.29 | 230 | 21.39 | 1575.26 | 2428.13 | 3.85 | 6025.02 | 954.72  | 97743.6 | 226.67 | 421.18  | 3115.92 | 0.15 | 20.5 | 32.60 | 33.07 | 0.00 | 43.38 | 35290.2 | 174.51 |
| 52 | 0.2 | 0.29 | 230 | 19.60 | 1467.87 | 2277.44 | 3.73 | 5295.62 | 725.03  | 90644.2 | 197.78 | 402.40  | 2908.43 | 0.14 | 19.8 | 29.80 | 30.23 | 0.00 | 40.33 | 34151.9 | 168.81 |
| 53 | 0.3 | 0.29 | 230 | 18.83 | 1422.99 | 2227.00 | 3.69 | 4857.12 | 647.51  | 88272.3 | 187.78 | 390.79  | 2838.96 | 0.14 | 19.6 | 28.60 | 29.02 | 0.00 | 38.97 | 33736.5 | 165.00 |
| 54 | 0.4 | 0.29 | 230 | 18.31 | 1394.26 | 2201.64 | 3.67 | 4433.52 | 608.08  | 87082.5 | 182.53 | 381.28  | 2804.01 | 0.13 | 19.4 | 27.83 | 28.24 | 0.00 | 38.04 | 33503.9 | 161.78 |
| 55 | 0.5 | 0.29 | 230 | 17.91 | 1372.37 | 2186.31 | 3.65 | 4244.82 | 583.94  | 86365.8 | 179.19 | 372.83  | 2782.88 | 0.13 | 19.3 | 27.23 | 27.63 | 0.00 | 37.31 | 33345.9 | 158.87 |
| 56 | 0.6 | 0.29 | 230 | 17.26 | 1338.33 | 2168.58 | 3.63 | 4110.72 | 555.39  | 85541.2 | 175.00 | 357.87  | 2758.43 | 0.13 | 19.1 | 26.29 | 26.67 | 0.00 | 36.13 | 33129.6 | 153.65 |
| 57 | 0.7 | 0.29 | 230 | 16.99 | 1324.11 | 2162.96 | 3.63 | 4008.12 | 546.10  | 85281.3 | 173.55 | 351.08  | 2750.67 | 0.13 | 19.0 | 25.90 | 26.27 | 0.00 | 35.62 | 33047.8 | 151.27 |
| 58 | 0.8 | 0.29 | 230 | 16.74 | 1311.12 | 2158.54 | 3.62 | 3925.62 | 538.66  | 85078.1 | 172.34 | 344.67  | 2744.56 | 0.13 | 19.0 | 25.53 | 26.10 | 0.00 | 35.15 | 32976.5 | 149.01 |
| 59 | 0.9 | 0.29 | 230 | 17.56 | 1354.18 | 2176.01 | 3.64 | 3856.82 | 567.46  | 85885.8 | 176.81 | 365.09  | 2768.67 | 0.13 | 19.2 | 26.73 | 25.12 | 0.00 | 35.68 | 33226.3 | 156.18 |
| 60 | 1.0 | 0.29 | 230 | 10.33 | 1300.23 | 2121.12 | 3.55 | 3798.02 | 560.72  | 83461.0 | 164.35 | 164.74  | 2692.46 | 0.12 | 18.7 | 26.46 | 24.53 | 0.00 | 33.08 | 31561.8 | 150.11 |
| 61 | 0.1 | 0.75 | 190 | 18.02 | 1311.79 | 2006.25 | 3.18 | 6521.29 | 790.89  | 80746.3 | 187.48 | 347.18  | 2574.44 | 0.12 | 17.0 | 28.08 | 28.48 | 0.00 | 36.75 | 28922.4 | 144.17 |
| 62 | 0.2 | 0.75 | 190 | 16.55 | 1223.08 | 1881.77 | 3.08 | 5123.94 | 601.14  | 74881.6 | 163.62 | 331.67  | 2403.04 | 0.12 | 16.5 | 25.76 | 26.13 | 0.00 | 34.23 | 27982   | 139.47 |
| 63 | 0.3 | 0.75 | 190 | 15.91 | 1186.00 | 1840.10 | 3.05 | 4287.33 | 537.10  | 72922.1 | 155.36 | 322.08  | 2345.65 | 0.11 | 16.3 | 24.78 | 25.13 | 0.00 | 33.10 | 27638.9 | 136.32 |
| 64 | 0.4 | 0.75 | 190 | 15.48 | 1162.27 | 1819.15 | 3.03 | 4182.52 | 504.53  | 71939.3 | 151.02 | 314.22  | 2316.78 | 0.11 | 16.1 | 24.13 | 24.48 | 0.00 | 32.34 | 27446.7 | 133.66 |
| 65 | 0.5 | 0.75 | 190 | 15.15 | 1144.18 | 1806.49 | 3.02 | 4018.84 | 484.59  | 71347.2 | 148.26 | 307.25  | 2299.32 | 0.11 | 16.0 | 23.64 | 23.98 | 0.00 | 31.73 | 27316.2 | 131.26 |
| 66 | 0.6 | 0.75 | 190 | 14.86 | 1129.16 | 1797.98 | 3.01 | 4002.01 | 470.98  | 70950.7 | 146.30 | 300.85  | 2287.59 | 0.11 | 15.9 | 23.23 | 23.56 | 0.00 | 31.22 | 27217.4 | 129.03 |
| 67 | 0.7 | 0.75 | 190 | 14.61 | 1116.06 | 1791.84 | 3.00 | 3992.42 | 461.01  | 70666   | 144.80 | 294.88  | 2279.13 | 0.11 | 15.9 | 22.86 | 23.19 | 0.00 | 30.76 | 27137.5 | 126.95 |
| 68 | 0.8 | 0.75 | 190 | 14.39 | 1104.32 | 1787.20 | 3.00 | 3940.22 | 453.33  | 70451.4 | 143.60 | 289.28  | 2272.71 | 0.11 | 15.8 | 22.54 | 22.86 | 0.00 | 30.34 | 27069.9 | 124.98 |
| 69 | 0.9 | 0.75 | 190 | 14.18 | 1093.59 | 1783.55 | 2.99 | 3879.93 | 447.19  | 70283.5 | 142.60 | 283.98  | 2267.67 | 0.11 | 15.8 | 22.24 | 22.55 | 0.00 | 29.95 | 27011.1 | 123.11 |
| 70 | 1.0 | 0.75 | 190 | 13.99 | 1083.66 | 1780.60 | 2.99 | 3828.22 | 442.13  | 70148.3 | 141.75 | 278.95  | 2263.59 | 0.11 | 15.7 | 21.96 | 22.27 | 0.00 | 29.59 | 26958.7 | 121.34 |
| 71 | 0.1 | 0.18 | 190 | 63.10 | 4922.10 | 7256.12 | 11.5 | 6109.5  | 2875.35 | 291196  | 688.53 | 1279.30 | 9315.69 | 0.46 | 62.9 | 96.48 | 97.93 | 0.01 | 127.5 | 115538  | 520.56 |
| 72 | 0.2 | 0.18 | 190 | 57.79 | 4602.72 | 6807.98 | 11.1 | 4713.2  | 2192.26 | 270083  | 602.62 | 1223.44 | 8698.63 | 0.43 | 60.9 | 88.15 | 89.48 | 0.01 | 118.4 | 112152  | 503.62 |
| 73 | 0.3 | 0.18 | 190 | 55.48 | 4469.25 | 6657.98 | 11.0 | 3908.1  | 1961.71 | 263028  | 572.89 | 1188.92 | 8492.03 | 0.42 | 60.1 | 84.60 | 85.88 | 0.01 | 114.4 | 110917  | 492.30 |

|     |     |      |     |       |         |         |      |         |         |         |        |         |         |      |      |       |       |      |       |         |        |
|-----|-----|------|-----|-------|---------|---------|------|---------|---------|---------|--------|---------|---------|------|------|-------|-------|------|-------|---------|--------|
| 74  | 0.4 | 0.18 | 190 | 53.94 | 4383.81 | 6582.54 | 10.9 | 3791.2  | 1844.47 | 259490  | 557.26 | 1160.64 | 8388.10 | 0.41 | 59.6 | 82.29 | 83.54 | 0.01 | 111.6 | 110225  | 482.72 |
| 75  | 0.5 | 0.18 | 190 | 52.74 | 4318.71 | 6536.96 | 10.9 | 3628.5  | 1772.67 | 257359  | 547.33 | 1135.53 | 8325.26 | 0.41 | 59.3 | 80.52 | 81.74 | 0.01 | 109.5 | 109755  | 474.07 |
| 76  | 0.6 | 0.18 | 190 | 51.73 | 4264.62 | 6506.32 | 10.9 | 3602.4  | 1723.68 | 255931  | 540.27 | 1112.48 | 8283.01 | 0.41 | 59.0 | 79.03 | 80.23 | 0.01 | 107.6 | 109400  | 466.06 |
| 77  | 0.7 | 0.18 | 190 | 50.83 | 4217.47 | 6484.24 | 10.8 | 3585.0  | 1687.78 | 254906  | 534.88 | 1091.02 | 8252.55 | 0.41 | 58.7 | 77.72 | 78.90 | 0.01 | 105.9 | 109112  | 458.55 |
| 78  | 0.8 | 0.18 | 190 | 50.01 | 4175.18 | 6467.52 | 10.8 | 3530.91 | 1660.13 | 254134  | 530.56 | 1070.84 | 8229.46 | 0.40 | 58.5 | 76.54 | 77.70 | 0.01 | 104.4 | 108869  | 451.46 |
| 79  | 0.9 | 0.18 | 190 | 49.27 | 4136.56 | 6454.38 | 10.8 | 3470.71 | 1638.03 | 253529  | 526.96 | 1051.76 | 8211.31 | 0.40 | 58.3 | 75.47 | 76.61 | 0.01 | 103.0 | 108657  | 444.75 |
| 80  | 1.0 | 0.18 | 190 | 48.57 | 4100.84 | 6443.75 | 10.8 | 3355.6  | 1619.83 | 253043  | 523.89 | 1033.66 | 8196.63 | 0.40 | 58.1 | 74.47 | 75.59 | 0.01 | 101.7 | 108468  | 438.37 |
| 81  | 0.1 | 0.29 | 190 | 63.61 | 4684.97 | 7221.09 | 11.4 | 5888.0  | 2839.31 | 290682  | 674.10 | 1252.57 | 9266.51 | 0.44 | 61.0 | 96.95 | 98.36 | 0.01 | 129.0 | 104959  | 518.97 |
| 82  | 0.2 | 0.29 | 190 | 58.30 | 4365.60 | 6772.96 | 11.0 | 4492.3  | 2156.21 | 269569  | 588.20 | 1196.71 | 8649.46 | 0.41 | 59.1 | 88.62 | 89.91 | 0.01 | 119.9 | 101574  | 502.02 |
| 83  | 0.3 | 0.29 | 190 | 55.99 | 4232.12 | 6622.95 | 10.9 | 3704.2  | 1925.67 | 262515  | 558.47 | 1162.19 | 8442.86 | 0.40 | 58.3 | 85.07 | 86.31 | 0.01 | 115.8 | 100338  | 490.71 |
| 84  | 0.4 | 0.29 | 190 | 54.45 | 4146.69 | 6547.51 | 10.9 | 3580.9  | 1808.43 | 258976  | 542.84 | 1133.91 | 8338.92 | 0.40 | 57.8 | 82.76 | 83.97 | 0.01 | 113.1 | 99646.4 | 481.13 |
| 85  | 0.5 | 0.29 | 190 | 53.25 | 4081.58 | 6501.93 | 10.8 | 3418.6  | 1736.63 | 256845  | 532.90 | 1108.79 | 8276.09 | 0.40 | 57.4 | 80.99 | 82.17 | 0.01 | 110.9 | 99176.5 | 472.47 |
| 86  | 0.6 | 0.29 | 190 | 52.24 | 4027.49 | 6471.29 | 10.8 | 3387.5  | 1687.63 | 255417  | 525.85 | 1085.75 | 8233.84 | 0.39 | 57.1 | 79.50 | 80.66 | 0.01 | 109.1 | 98820.9 | 464.46 |
| 87  | 0.7 | 0.29 | 190 | 51.34 | 3980.34 | 6449.21 | 10.8 | 3365.9  | 1651.74 | 254393  | 520.46 | 1064.29 | 8203.37 | 0.39 | 56.9 | 78.19 | 79.33 | 0.01 | 107.4 | 98533.2 | 456.95 |
| 88  | 0.8 | 0.29 | 190 | 50.52 | 3938.06 | 6432.49 | 10.7 | 3310.8  | 1624.09 | 253620  | 516.13 | 1044.11 | 8180.29 | 0.39 | 56.7 | 77.02 | 78.14 | 0.01 | 105.9 | 98290.0 | 449.87 |
| 89  | 0.9 | 0.29 | 190 | 49.77 | 3899.43 | 6419.35 | 10.7 | 3250.6  | 1601.98 | 253015  | 512.54 | 1025.03 | 8162.14 | 0.39 | 56.4 | 75.94 | 77.04 | 0.01 | 104.5 | 98078.1 | 443.16 |
| 90  | 1.0 | 0.29 | 190 | 49.08 | 3863.71 | 6408.72 | 10.7 | 3199.08 | 1583.79 | 252529  | 509.47 | 1006.93 | 8147.45 | 0.39 | 56.3 | 74.94 | 76.02 | 0.01 | 103.2 | 97889.5 | 436.77 |
| 91  | 0.1 | 0.75 | 94  | 9.50  | 704.78  | 1049.46 | 1.67 | 3364.4  | 416.01  | 42171.5 | 98.91  | 182.78  | 1346.94 | 0.07 | 9.08 | 15.03 | 15.25 | 0.00 | 19.40 | 15747.8 | 75.35  |
| 92  | 0.2 | 0.75 | 94  | 8.73  | 658.49  | 984.51  | 1.61 | 2635.24 | 316.99  | 39111.1 | 86.46  | 174.69  | 1257.50 | 0.06 | 8.79 | 13.82 | 14.02 | 0.00 | 18.09 | 15257.1 | 72.89  |
| 93  | 0.3 | 0.75 | 94  | 8.39  | 639.14  | 962.76  | 1.60 | 2230.52 | 283.58  | 38088.6 | 82.15  | 169.68  | 1227.55 | 0.06 | 8.68 | 13.31 | 13.50 | 0.00 | 17.50 | 15078.0 | 71.25  |
| 94  | 0.4 | 0.75 | 94  | 8.17  | 626.76  | 951.83  | 1.59 | 2198.35 | 266.58  | 37575.8 | 79.88  | 165.58  | 1212.49 | 0.06 | 8.61 | 12.98 | 13.16 | 0.00 | 17.10 | 14977.7 | 69.86  |
| 95  | 0.5 | 0.75 | 94  | 8.00  | 617.32  | 945.22  | 1.58 | 2120.94 | 256.18  | 37266.8 | 78.44  | 161.94  | 1203.38 | 0.06 | 8.56 | 12.72 | 12.90 | 0.00 | 16.79 | 14909.6 | 68.61  |
| 96  | 0.6 | 0.75 | 94  | 7.85  | 609.48  | 940.78  | 1.58 | 2055.97 | 249.07  | 37059.9 | 77.42  | 158.60  | 1197.26 | 0.06 | 8.51 | 12.50 | 12.68 | 0.00 | 16.52 | 14858.1 | 67.45  |
| 97  | 0.7 | 0.75 | 94  | 7.72  | 602.65  | 937.58  | 1.57 | 1959.22 | 243.87  | 36911.4 | 76.64  | 155.49  | 1192.84 | 0.06 | 8.48 | 12.31 | 12.49 | 0.00 | 16.28 | 14816.4 | 66.36  |
| 98  | 0.8 | 0.75 | 94  | 7.60  | 596.52  | 935.16  | 1.57 | 1900.55 | 239.86  | 36799.4 | 76.01  | 152.57  | 1189.50 | 0.06 | 8.44 | 12.14 | 12.31 | 0.00 | 16.06 | 14781.1 | 65.33  |
| 99  | 0.9 | 0.75 | 94  | 7.49  | 590.92  | 933.25  | 1.57 | 1850.09 | 236.66  | 36711.7 | 75.49  | 149.80  | 1186.86 | 0.06 | 8.41 | 11.99 | 12.16 | 0.00 | 15.86 | 14750.4 | 64.36  |
| 100 | 1.0 | 0.75 | 94  | 7.39  | 585.74  | 931.71  | 1.57 | 1819.1  | 234.02  | 36641.2 | 75.05  | 147.18  | 1184.74 | 0.06 | 8.39 | 11.84 | 12.01 | 0.00 | 15.67 | 14723.1 | 63.43  |
| 101 | 0.1 | 0.18 | 94  | 8.85  | 668.14  | 1049.75 | 1.62 | 3209.71 | 410.40  | 42094.4 | 262.47 | 182.37  | 1347.47 | 0.07 | 9.32 | 13.66 | 13.87 | 0.00 | 17.99 | 16626.2 | 83.67  |
| 102 | 0.2 | 0.18 | 94  | 8.08  | 621.85  | 984.80  | 1.56 | 2480.54 | 311.38  | 39034.1 | 250.02 | 174.27  | 1258.03 | 0.06 | 9.04 | 12.45 | 12.65 | 0.00 | 16.67 | 16135.5 | 81.21  |
| 103 | 0.3 | 0.18 | 94  | 7.74  | 602.50  | 963.05  | 1.55 | 2157.31 | 277.96  | 38011.6 | 245.71 | 169.27  | 1228.08 | 0.06 | 8.93 | 11.94 | 12.13 | 0.00 | 16.08 | 15956.5 | 79.57  |
| 104 | 0.4 | 0.18 | 94  | 7.52  | 590.11  | 952.12  | 1.54 | 2093.65 | 260.97  | 37498.7 | 243.44 | 165.17  | 1213.02 | 0.06 | 8.85 | 11.60 | 11.79 | 0.00 | 15.69 | 15856.2 | 78.18  |

|     |     |      |     |       |        |         |      |          |        |         |        |         |         |      |      |       |       |      |       |         |        |
|-----|-----|------|-----|-------|--------|---------|------|----------|--------|---------|--------|---------|---------|------|------|-------|-------|------|-------|---------|--------|
| 105 | 0.5 | 0.18 | 94  | 7.35  | 580.68 | 945.51  | 1.53 | 2008.24  | 250.56 | 37189.7 | 242.00 | 161.53  | 1203.91 | 0.06 | 8.80 | 11.35 | 11.53 | 0.00 | 15.37 | 15788.1 | 76.93  |
| 106 | 0.6 | 0.18 | 94  | 7.20  | 572.84 | 941.07  | 1.53 | 1947.28  | 243.46 | 36982.8 | 240.98 | 158.19  | 1197.79 | 0.06 | 8.76 | 11.13 | 11.31 | 0.00 | 15.10 | 15736.5 | 75.77  |
| 107 | 0.7 | 0.18 | 94  | 7.07  | 566.00 | 937.87  | 1.52 | 1900.53  | 238.26 | 36834.3 | 240.20 | 155.08  | 1193.37 | 0.06 | 8.72 | 10.94 | 11.11 | 0.00 | 14.86 | 15694.8 | 74.68  |
| 108 | 0.8 | 0.18 | 94  | 6.95  | 559.87 | 935.45  | 1.52 | 1862.85  | 234.25 | 36722.3 | 239.57 | 152.15  | 1190.02 | 0.06 | 8.69 | 10.77 | 10.94 | 0.00 | 14.64 | 15659.6 | 73.65  |
| 109 | 0.9 | 0.18 | 94  | 6.84  | 554.27 | 933.54  | 1.52 | 1831.39  | 231.05 | 36634.7 | 239.05 | 149.39  | 1187.39 | 0.06 | 8.66 | 10.61 | 10.78 | 0.00 | 14.44 | 15628.9 | 72.68  |
| 110 | 1.0 | 0.18 | 94  | 6.74  | 549.10 | 932.00  | 1.52 | 1804.41  | 228.41 | 36564.1 | 238.60 | 146.77  | 1185.26 | 0.06 | 8.63 | 10.47 | 10.63 | 0.00 | 14.25 | 15601.5 | 71.76  |
| 111 | 0.1 | 0.29 | 94  | 8.70  | 645.62 | 986.81  | 1.56 | 3093.16  | 395.32 | 40949.2 | 200.92 | 3964.26 | 1265.69 | 0.06 | 5.12 | 13.06 | 13.26 | 0.00 | 17.89 | 9122.29 | 78.75  |
| 112 | 0.2 | 0.29 | 94  | 7.93  | 599.32 | 921.85  | 1.51 | 2364     | 296.31 | 37888.8 | 188.47 | 3956.16 | 1176.25 | 0.06 | 4.83 | 11.85 | 12.03 | 0.00 | 16.58 | 8631.6  | 76.29  |
| 113 | 0.3 | 0.29 | 94  | 7.59  | 579.98 | 900.11  | 1.49 | 2110.77  | 262.89 | 36866.3 | 184.16 | 3951.16 | 1146.30 | 0.06 | 4.72 | 11.34 | 11.51 | 0.00 | 15.99 | 8452.53 | 74.65  |
| 114 | 0.4 | 0.29 | 94  | 7.37  | 567.59 | 889.17  | 1.48 | 1977.11  | 245.90 | 36353.5 | 181.90 | 3947.06 | 1131.24 | 0.06 | 4.65 | 11.00 | 11.17 | 0.00 | 15.59 | 8352.26 | 73.26  |
| 115 | 0.5 | 0.29 | 94  | 7.20  | 558.16 | 882.57  | 1.48 | 1891.7   | 235.49 | 36044.5 | 180.46 | 3943.42 | 1122.13 | 0.06 | 4.59 | 10.74 | 10.91 | 0.00 | 15.28 | 8284.15 | 72.01  |
| 116 | 0.6 | 0.29 | 94  | 7.05  | 550.32 | 878.13  | 1.47 | 1830.74  | 228.39 | 35837.6 | 179.43 | 3940.08 | 1116.01 | 0.05 | 4.55 | 10.53 | 10.69 | 0.00 | 15.01 | 8232.60 | 70.85  |
| 117 | 0.7 | 0.29 | 94  | 6.92  | 543.48 | 874.93  | 1.47 | 1783.99  | 223.19 | 35689.1 | 178.65 | 3936.97 | 1111.59 | 0.05 | 4.51 | 10.34 | 10.50 | 0.00 | 14.77 | 8190.90 | 69.76  |
| 118 | 0.8 | 0.29 | 94  | 6.80  | 537.35 | 872.50  | 1.47 | 1746.31  | 219.18 | 35577   | 178.03 | 3934.04 | 1108.24 | 0.05 | 4.48 | 10.17 | 10.33 | 0.00 | 14.55 | 8155.65 | 68.73  |
| 119 | 0.9 | 0.29 | 94  | 6.69  | 531.75 | 870.60  | 1.46 | 1714.85  | 215.97 | 35489.4 | 177.51 | 3931.28 | 1105.61 | 0.05 | 4.45 | 10.01 | 10.17 | 0.00 | 14.35 | 8124.93 | 67.76  |
| 120 | 1.0 | 0.29 | 94  | 6.59  | 526.58 | 869.06  | 1.46 | 1687.87  | 213.34 | 35418.9 | 177.06 | 3928.66 | 1103.48 | 0.05 | 4.42 | 9.87  | 10.02 | 0.00 | 14.16 | 8097.60 | 66.83  |
| 121 | 0.1 | 0.75 | 143 | 13.57 | 996.50 | 1502.72 | 2.39 | 4394.2   | 594.06 | 60443.9 | 141.06 | 261.32  | 1928.56 | 0.09 | 12.8 | 21.32 | 21.62 | 0.00 | 27.71 | 22184   | 107.96 |
| 122 | 0.2 | 0.75 | 143 | 12.47 | 930.12 | 1409.58 | 2.31 | 3660.81  | 452.08 | 56055.8 | 123.21 | 249.71  | 1800.31 | 0.09 | 12.4 | 19.59 | 19.87 | 0.00 | 25.82 | 21480.4 | 104.44 |
| 123 | 0.3 | 0.75 | 143 | 11.98 | 902.38 | 1378.40 | 2.28 | 3211.2   | 404.17 | 54589.6 | 117.03 | 242.53  | 1757.37 | 0.08 | 12.3 | 18.85 | 19.12 | 0.00 | 24.98 | 21223.6 | 102.09 |
| 124 | 0.4 | 0.75 | 143 | 11.67 | 884.62 | 1362.73 | 2.27 | 2806.62  | 379.80 | 53854.2 | 113.78 | 236.66  | 1735.77 | 0.08 | 12.2 | 18.37 | 18.63 | 0.00 | 24.41 | 21079.9 | 100.09 |
| 125 | 0.5 | 0.75 | 143 | 11.42 | 871.09 | 1353.25 | 2.26 | 2620.074 | 364.87 | 53411.2 | 111.71 | 231.44  | 1722.71 | 0.08 | 12.1 | 18.00 | 18.26 | 0.00 | 23.96 | 20982.2 | 98.30  |
| 126 | 0.6 | 0.75 | 143 | 11.20 | 859.84 | 1346.88 | 2.26 | 2487.464 | 354.69 | 53114.5 | 110.25 | 226.65  | 1713.93 | 0.08 | 12.0 | 17.69 | 17.94 | 0.00 | 23.57 | 20908.3 | 96.63  |
| 127 | 0.7 | 0.75 | 143 | 11.02 | 850.04 | 1342.29 | 2.25 | 2386.11  | 347.23 | 52901.5 | 109.13 | 222.19  | 1707.60 | 0.08 | 12.0 | 17.42 | 17.67 | 0.00 | 23.23 | 20848.5 | 95.07  |
| 128 | 0.8 | 0.75 | 143 | 10.85 | 841.26 | 1338.82 | 2.25 | 2304.68  | 341.49 | 52740.9 | 108.23 | 217.99  | 1702.80 | 0.08 | 11.9 | 17.18 | 17.42 | 0.00 | 22.91 | 20797.9 | 93.60  |
| 129 | 0.9 | 0.75 | 143 | 10.69 | 833.23 | 1336.09 | 2.24 | 2236.83  | 336.89 | 52615.3 | 107.48 | 214.03  | 1699.03 | 0.08 | 11.9 | 16.95 | 17.19 | 0.00 | 22.62 | 20753.9 | 92.20  |
| 130 | 1.0 | 0.75 | 143 | 10.55 | 825.80 | 1333.88 | 2.24 | 2178.77  | 333.11 | 52514.2 | 106.84 | 210.26  | 1695.97 | 0.08 | 11.9 | 16.75 | 16.98 | 0.00 | 22.35 | 20714.7 | 90.88  |
| 131 | 0.1 | 0.18 | 143 | 12.72 | 961.87 | 1505.43 | 2.32 | 4116.79  | 588.93 | 60365.6 | 376.55 | 262.14  | 1932.48 | 0.09 | 13.3 | 19.69 | 19.99 | 0.00 | 25.87 | 24023.3 | 120.00 |
| 132 | 0.2 | 0.18 | 143 | 11.61 | 895.49 | 1412.28 | 2.24 | 3367.37  | 446.95 | 55977.4 | 358.69 | 250.53  | 1804.23 | 0.09 | 12.9 | 17.95 | 18.23 | 0.00 | 23.99 | 23319.7 | 116.47 |
| 133 | 0.3 | 0.18 | 143 | 11.13 | 867.75 | 1381.11 | 2.22 | 2927.20  | 399.03 | 54511.3 | 352.51 | 243.36  | 1761.29 | 0.09 | 12.8 | 17.22 | 17.49 | 0.00 | 23.14 | 23062.9 | 114.12 |
| 134 | 0.4 | 0.18 | 143 | 10.81 | 850.00 | 1365.43 | 2.20 | 2544.09  | 374.67 | 53775.9 | 349.26 | 237.48  | 1739.69 | 0.09 | 12.7 | 16.74 | 17.00 | 0.00 | 22.57 | 22919.1 | 112.13 |
| 135 | 0.5 | 0.18 | 143 | 10.56 | 836.46 | 1355.95 | 2.20 | 2365.62  | 359.74 | 53332.9 | 347.20 | 232.26  | 1726.63 | 0.08 | 12.6 | 16.37 | 16.63 | 0.00 | 22.12 | 22821.5 | 110.33 |

|     |     |      |     |       |        |         |      |         |        |         |        |         |         |      |      |       |       |      |       |         |        |
|-----|-----|------|-----|-------|--------|---------|------|---------|--------|---------|--------|---------|---------|------|------|-------|-------|------|-------|---------|--------|
| 136 | 0.6 | 0.18 | 143 | 10.35 | 825.22 | 1349.59 | 2.19 | 2239.11 | 349.56 | 53036.2 | 345.73 | 227.47  | 1717.85 | 0.08 | 12.5 | 16.06 | 16.31 | 0.00 | 21.73 | 22747.6 | 108.67 |
| 137 | 0.7 | 0.18 | 143 | 10.16 | 815.42 | 1345.00 | 2.19 | 2142.64 | 342.10 | 52823.2 | 344.61 | 223.01  | 1711.52 | 0.08 | 12.5 | 15.79 | 16.04 | 0.00 | 21.39 | 22687.8 | 107.11 |
| 138 | 0.8 | 0.18 | 143 | 10.00 | 806.63 | 1341.52 | 2.18 | 2065.27 | 336.35 | 52662.6 | 343.71 | 218.81  | 1706.72 | 0.08 | 12.4 | 15.54 | 15.79 | 0.00 | 21.08 | 22637.2 | 105.63 |
| 139 | 0.9 | 0.18 | 143 | 9.84  | 798.60 | 1338.79 | 2.18 | 2000.91 | 331.76 | 52537   | 342.97 | 214.85  | 1702.95 | 0.08 | 12.4 | 15.32 | 15.56 | 0.00 | 20.79 | 22593.2 | 104.24 |
| 140 | 1.0 | 0.18 | 143 | 9.48  | 929.55 | 1246.32 | 2.10 | 1909.82 | 310.31 | 51723.4 | 322.30 | 5684.96 | 1582.63 | 0.08 | 12.3 | 15.30 | 14.56 | 0.00 | 20.38 | 21793.2 | 95.86  |
| 141 | 0.1 | 0.29 | 143 | 12.50 | 863.17 | 1415.17 | 2.24 | 3967.58 | 425.33 | 54335.2 | 270.44 | 5673.35 | 1815.21 | 0.09 | 6.95 | 17.09 | 17.35 | 0.00 | 25.74 | 13262.5 | 112.94 |
| 142 | 0.2 | 0.29 | 143 | 11.40 | 835.42 | 1322.03 | 2.16 | 3209.5  | 377.42 | 52869.1 | 264.26 | 5666.18 | 1686.96 | 0.08 | 6.79 | 16.35 | 16.61 | 0.00 | 23.85 | 12558.9 | 109.42 |
| 143 | 0.3 | 0.29 | 143 | 10.92 | 817.67 | 1290.85 | 2.14 | 2774.48 | 353.05 | 52133.7 | 261.02 | 5660.30 | 1644.02 | 0.08 | 6.69 | 15.87 | 16.12 | 0.00 | 23.01 | 12302.1 | 107.07 |
| 144 | 0.4 | 0.29 | 143 | 10.60 | 804.13 | 1275.17 | 2.13 | 2402.92 | 338.12 | 51690.7 | 258.95 | 5655.08 | 1622.42 | 0.08 | 6.61 | 15.50 | 15.74 | 0.00 | 22.44 | 12158.3 | 105.08 |
| 145 | 0.5 | 0.29 | 143 | 10.35 | 792.89 | 1265.69 | 2.12 | 2228.79 | 327.94 | 51394   | 257.48 | 5650.29 | 1609.36 | 0.08 | 6.55 | 15.19 | 15.43 | 0.00 | 21.98 | 12060.7 | 103.28 |
| 146 | 0.6 | 0.29 | 143 | 10.14 | 783.09 | 1259.33 | 2.11 | 2105.5  | 320.48 | 51181   | 256.36 | 5645.83 | 1600.58 | 0.08 | 6.50 | 14.92 | 15.15 | 0.00 | 21.60 | 11986.7 | 101.61 |
| 147 | 0.7 | 0.29 | 143 | 9.95  | 774.30 | 1254.74 | 2.11 | 2011.71 | 314.73 | 51020.4 | 255.47 | 5641.63 | 1594.25 | 0.08 | 6.45 | 14.68 | 14.91 | 0.00 | 21.25 | 11926.9 | 100.05 |
| 148 | 0.8 | 0.29 | 143 | 9.78  | 766.28 | 1251.26 | 2.10 | 1936.52 | 310.14 | 50894.7 | 254.72 | 5637.67 | 1589.45 | 0.08 | 6.41 | 14.45 | 14.68 | 0.00 | 20.94 | 11876.4 | 98.58  |
| 149 | 0.9 | 0.29 | 143 | 9.63  | 791.18 | 1248.53 | 2.10 | 1874.0  | 327.98 | 52435.8 | 242.33 | 211.09  | 1585.68 | 0.08 | 6.37 | 15.11 | 15.35 | 0.00 | 20.65 | 11832.4 | 97.18  |
| 150 | 1.0 | 0.29 | 143 | 9.48  | 758.85 | 1246.32 | 2.10 | 1820.71 | 306.36 | 50793.6 | 234.08 | 5633.91 | 1582.63 | 0.08 | 6.37 | 14.25 | 14.47 | 0.00 | 20.38 | 11793.2 | 95.86  |

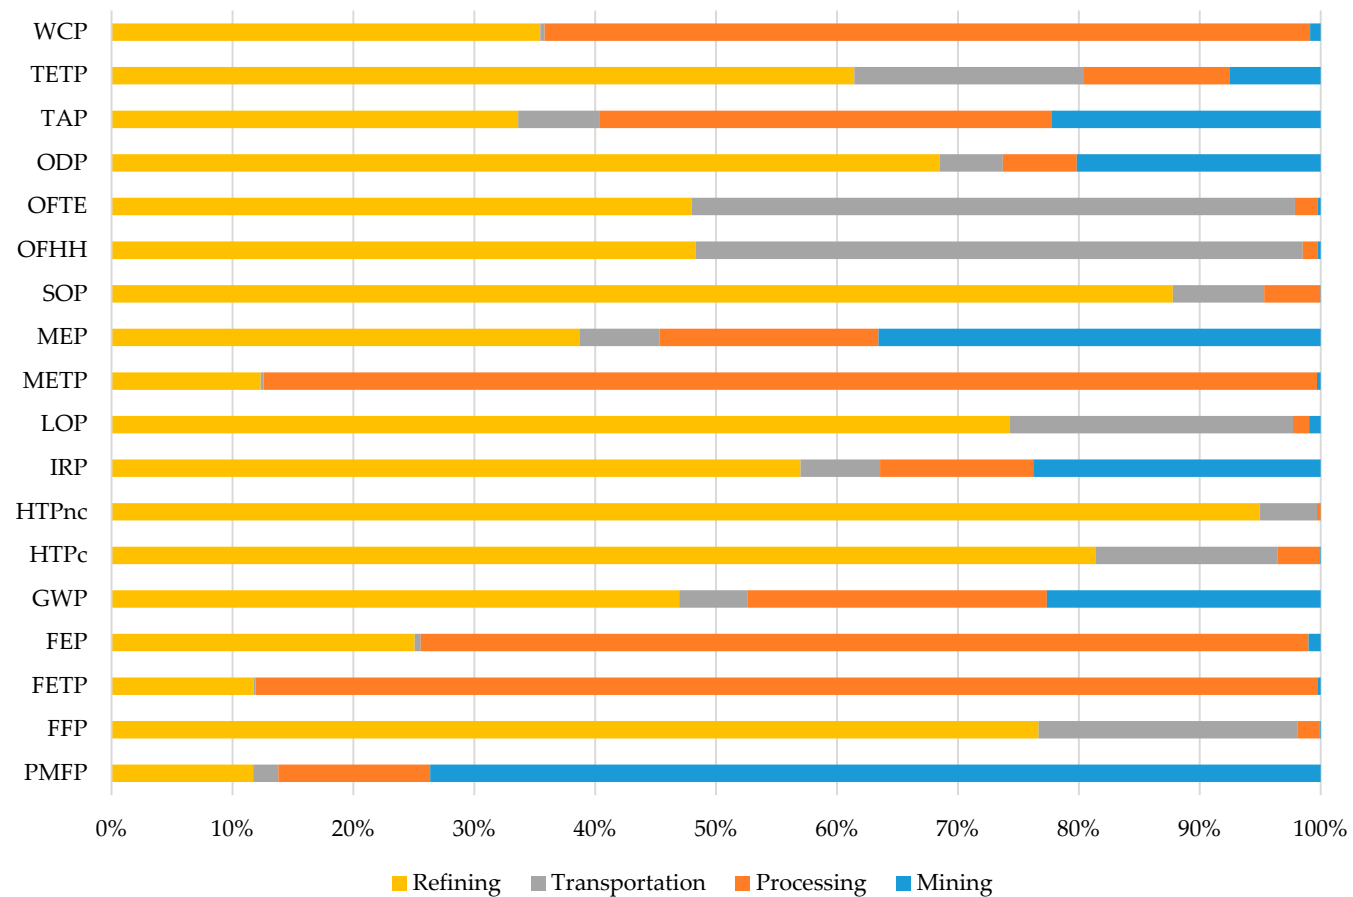

**Figure S2:** Relative proportion of environmental impacts per MWh of NMC111 storage, across all life cycle stages considered in the base case

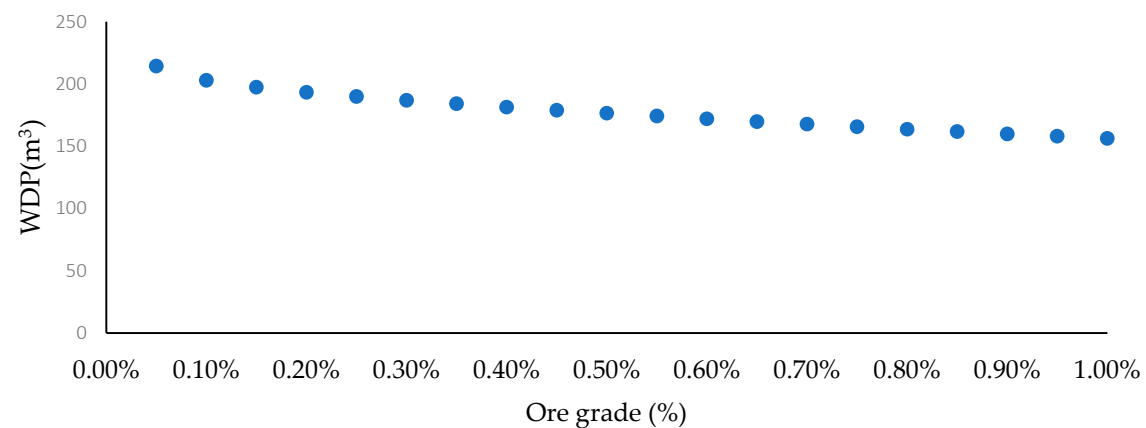

**Figure S3:** Impact of ore grade on water depletion of mining and processing of  $\text{Co}(\text{OH})_2$

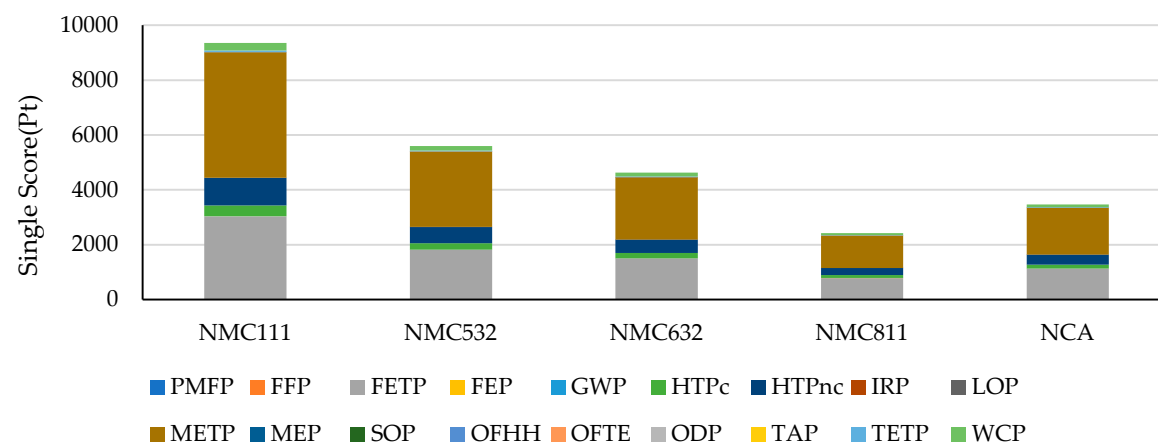

**Figure S4:** Single-score results for environmental impacts comparison of different battery chemistries (location—China and ore grade—0.3%)

**Table S7: Single score results for battery chemistries and locations for an ore grade of 0.3%**

|               |                   | PMFP | FFP  | FETP    | FEP   | GWP  | HTPc   | HTPnc   | IRP  | LOP  | METP    | MEP  | SOP  | OFHH | OFTE | ODP  | TAP  | TETP   | WCP    | Total    |
|---------------|-------------------|------|------|---------|-------|------|--------|---------|------|------|---------|------|------|------|------|------|------|--------|--------|----------|
| <b>NMC111</b> | Base Case (China) | 1.23 | 2.43 | 3027.65 | 9.52  | 1.08 | 394.05 | 1000.17 | 0.66 | 0.11 | 4583.86 | 0.05 | 0.00 | 2.43 | 2.85 | 0.00 | 1.60 | 52.83  | 273.11 | 9353.62  |
|               | Canada (NA)       | 1.19 | 2.41 | 3076.06 | 9.33  | 1.04 | 393.20 | 999.60  | 2.00 | 0.11 | 4663.76 | 0.05 | 0.00 | 2.27 | 2.67 | 0.00 | 1.54 | 60.30  | 311.86 | 9527.40  |
|               | Finland (EU)      | 1.16 | 2.32 | 2875.00 | 8.99  | 1.01 | 371.87 | 969.48  | 1.50 | 2.51 | 4353.17 | 0.05 | 0.00 | 2.16 | 2.54 | 0.00 | 1.53 | 31.92  | 292.58 | 8917.79  |
| <b>NMC532</b> | Base Case (China) | 0.75 | 1.46 | 1814.25 | 5.68  | 0.65 | 234.17 | 592.13  | 0.39 | 0.06 | 2749.57 | 0.03 | 0.00 | 1.45 | 1.70 | 0.00 | 0.98 | 32.01  | 164.95 | 5600.03  |
|               | Canada (NA)       | 0.73 | 1.53 | 1824.63 | 5.71  | 0.62 | 238.14 | 593.47  | 0.40 | 0.06 | 2767.00 | 0.03 | 0.00 | 1.38 | 1.63 | 0.00 | 0.94 | 35.99  | 165.54 | 5637.61  |
|               | Finland (EU)      | 0.74 | 1.45 | 1815.01 | 5.68  | 0.61 | 233.75 | 592.31  | 0.39 | 0.06 | 2750.95 | 0.03 | 0.00 | 1.39 | 1.63 | 0.00 | 0.95 | 32.56  | 165.00 | 5602.31  |
| <b>NMC632</b> | Base Case (China) | 0.62 | 1.21 | 1499.68 | 4.70  | 0.54 | 193.89 | 489.31  | 0.32 | 0.05 | 2272.93 | 0.02 | 0.00 | 1.20 | 1.41 | 0.00 | 0.81 | 26.67  | 136.32 | 4629.70  |
|               | Canada (NA)       | 2.17 | 4.56 | 5426.25 | 16.94 | 0.49 | 708.18 | 1764.92 | 1.19 | 0.19 | 8228.78 | 0.09 | 0.00 | 4.11 | 4.84 | 0.17 | 2.79 | 107.03 | 492.30 | 16765.00 |
|               | Finland (EU)      | 2.19 | 4.32 | 5397.70 | 16.79 | 0.46 | 695.17 | 1761.48 | 1.16 | 0.19 | 8181.13 | 0.09 | 0.00 | 4.13 | 4.86 | 0.17 | 2.83 | 96.83  | 490.71 | 16660.19 |
| <b>NMC811</b> | Base Case (China) | 0.33 | 0.65 | 784.65  | 2.46  | 0.28 | 102.37 | 255.57  | 0.17 | 0.03 | 1189.50 | 0.01 | 0.00 | 0.65 | 0.76 | 0.00 | 0.43 | 14.55  | 71.25  | 2423.66  |
|               | Canada (NA)       | 0.30 | 0.61 | 784.89  | 2.39  | 0.27 | 100.34 | 255.06  | 0.51 | 0.03 | 1190.01 | 0.01 | 0.00 | 0.58 | 0.68 | 0.00 | 0.39 | 15.40  | 79.57  | 2431.05  |
|               | Finland (EU)      | 0.30 | 0.59 | 733.59  | 2.29  | 0.26 | 94.90  | 247.37  | 0.38 | 0.64 | 1110.76 | 0.01 | 0.00 | 0.55 | 0.65 | 0.00 | 0.39 | 8.16   | 74.65  | 2275.51  |
| <b>NCA</b>    | Base Case (China) | 0.47 | 0.92 | 1123.40 | 3.51  | 0.40 | 145.91 | 366.30  | 0.24 | 0.04 | 1702.89 | 0.02 | 0.00 | 0.92 | 1.08 | 0.00 | 0.61 | 20.48  | 102.09 | 3469.26  |
|               | Canada (NA)       | 0.44 | 0.89 | 1125.60 | 3.42  | 0.37 | 144.05 | 365.77  | 0.73 | 0.04 | 1706.69 | 0.02 | 0.00 | 0.84 | 0.98 | 0.00 | 0.56 | 22.26  | 114.12 | 3486.78  |
|               | Finland (EU)      | 0.43 | 0.83 | 1052.04 | 3.30  | 0.35 | 127.45 | 349.82  | 0.54 | 0.92 | 1593.06 | 0.02 | 0.00 | 0.77 | 0.91 | 0.00 | 0.56 | 11.87  | 107.07 | 3249.93  |
